# Supplementary material for: Acceptance and knowledge of evolutionary theory among third-year university students in Spain
Source: PLoS One. 2020 Sep 3;15(9):e0238345. doi: 10.1371/journal.pone.0238345 (PMC7470367; doi:10.1371/journal.pone.0238345)
Supplement: S1 Data — (XLSX) [file pone.0238345.s001.xlsx]

## Sheet: DATA Evolution Questionaries
Individual	Date	codeweb	Sex	Age	Level	preuniversity	Area	University	Faculty	Religion	complete	MATE	KEE	FACUL2	UNI2
1	11/09/2018 11:09:05	asd345	2	21	1	1	1	1	1	0	1	98	8	2	5
2	11/09/2018 11:10:27	asd345	2	20	1	1	1	1	1	0	1	80	7	2	5
3	11/09/2018 11:10:41	asd345	2	19	2	1	1	1	1	1	1	82	4	2	5
4	11/09/2018 11:10:42	asd345	2	19	1	1	1	1	1	0	1	82	3	2	5
5	11/09/2018 11:11:44	asd345	1	21	1	1	1	1	1	0	1	94	8	2	5
6	11/09/2018 11:11:57	asd345	1	20	1	1	1	1	1	0	1	91	4	2	5
7	11/09/2018 11:12:01	asd345	1	22	1	1	1	1	1	0	1	94	7	2	5
8	11/09/2018 11:12:13	asd345	2	20	1	1	1	1	1	0	1	96	7	2	5
9	11/09/2018 11:12:15	asd345	1	19	1	1	1	1	1	0	1	90	5	2	5
10	11/09/2018 11:13:03	asd345	1	20	1	1	1	1	1	0	1	79	9	2	5
11	11/09/2018 11:13:08	asd345	1	23	1	1	1	1	1	0	1	84	6	2	5
12	11/09/2018 11:13:11	asd345	2	20	1	1	1	1	1	1	1	95	4	2	5
13	11/09/2018 11:13:19	asd345	1	21	1	1	1	1	1	0	1	99	7	2	5
14	11/09/2018 11:13:32	asd345	1	21	1	1	1	1	1	0	1	87	5	2	5
15	11/09/2018 11:13:38	asd345	2	20	1	1	1	1	1	1	1	76	1	2	5
16	11/09/2018 11:13:51	asd345	1	23	1	1	1	1	1	1	1	63	3	2	5
17	11/09/2018 11:14:02	asd345	2	20	1	1	1	1	1	1	1	85	6	2	5
18	11/09/2018 11:14:21	asd345	2	21	1	1	1	1	1	0	1	86	2	2	5
19	11/09/2018 11:14:26	asd345	2	22	1	1	1	1	1	0	1	98	6	2	5
20	11/09/2018 11:14:27	asd345	2	19	1	1	1	1	1	1	1	73	6	2	5
21	11/09/2018 11:14:28	asd345	2	20	1	1	1	1	1	0	1	90	6	2	5
22	11/09/2018 11:14:28	asd345	2	20	1	1	1	1	1	0	1	73	5	2	5
23	11/09/2018 11:14:52	asd345	2	21	1	1	1	1	1	0	1	84	6	2	5
24	11/09/2018 11:15:16	asd345	2	22	2	1	1	1	1	0	1	85	4	2	5
25	11/09/2018 11:15:38	asd345	1	19	1	1	1	1	1	0	1	80	3	2	5
26	11/09/2018 11:15:56	asd345	2	20	1	2	1	1	1	0	1	86	2	2	5
28	11/09/2018 11:16:09	asd345	2	20	1	1	1	1	1	0	1	77	3	2	5
29	11/09/2018 11:16:40	asd345	2	20	1	1	1	1	1	0	1	92	3	2	5
30	11/09/2018 11:17:23	asd345	2	24	1	5	1	1	1	0	1	84	6	2	5
31	11/09/2018 11:17:24	asd345	2	20	1	1	1	1	1	0	1	78	4	2	5
32	11/09/2018 11:17:45	asd345	2	19	1	1	1	1	1	1	1	94	7	2	5
33	11/09/2018 11:21:02	asd345	2	21	1	1	1	1	1	0	1	80	6	2	5
34	18/09/2018 12:17:25	asd345	1	20	1	4	1	1	2	0	1	99	4	3	5
35	18/09/2018 12:19:11	asd345	1	19	1	4	1	1	2	0	1	82	6	3	5
36	18/09/2018 12:19:33	asd345	1	21	1	3	1	1	2	0	1	83	6	3	5
37	18/09/2018 12:19:51	asd345	2	21	1	3	1	1	2	0	1	77	4	3	5
38	18/09/2018 12:20:15	asd345	1	23	1	3	1	1	2	0	1	87	5	3	5
39	18/09/2018 12:20:22	asd345	2	18	1	4	1	1	2	0	1	79	7	3	5
40	18/09/2018 12:26:03	asd345	1	27	1	2	1	1	2	0	1	86	4	3	5
41	18/09/2018 12:27:08	asd345	1	20	1	3	1	1	2	1	1	70	2	3	5
42	24/09/2018 10:57:59	asd345	1	25	1	3	1	1	3	0	1	95	6	1	5
44	24/09/2018 10:58:32	asd345	2	19	1	3	1	1	3	0	1	74	2	1	5
45	24/09/2018 11:01:17	asd345	2	20	1	4	1	1	3	0	1	81	6	1	5
46	24/09/2018 11:02:11	asd345	2	22	2	5	1	1	3	1	1	74	3	1	5
48	24/09/2018 11:02:41	asd345	2	26	1	1	1	1	3	0	1	99	6	1	5
49	24/09/2018 11:02:58	asd345	2	25	1	3	1	1	3	0	1	71	6	1	5
50	24/09/2018 11:03:16	asd345	2	23	1	3	1	1	3	0	1	90	8	1	5
51	25/09/2018 14:50:47	asd345	2	20	1	3	1	1	3	0	1	93	7	1	5
52	28/09/2018 12:52:24	asd345	1	20	1	1	1	1	4	0	1	91	7	4	5
53	28/09/2018 12:52:57	asd345	2	20	1	1	1	1	4	0	1	98	4	4	5
54	28/09/2018 12:53:07	asd345	2	20	1	1	1	1	4	0	1	92	5	4	5
55	28/09/2018 12:53:08	asd345	2	20	1	1	1	1	4	0	1	77	6	4	5
56	28/09/2018 12:53:09	asd345	2	20	1	1	1	1	4	0	1	95	5	4	5
57	28/09/2018 12:53:23	asd345	2	19	1	1	1	1	4	0	1	80	6	4	5
58	28/09/2018 12:53:28	asd345	1	20	1	1	1	1	4	0	1	84	6	4	5
59	28/09/2018 12:54:01	asd345	2	19	1	1	1	1	4	0	1	95	6	4	5
60	28/09/2018 12:54:34	asd345	2	20	1	1	1	1	4	0	1	94	7	4	5
61	28/09/2018 12:54:38	asd345	2	19	1	1	1	1	4	0	1	84	4	4	5
62	28/09/2018 12:54:57	asd345	2	19	1	1	1	1	4	0	1	83	7	4	5
64	28/09/2018 12:55:16	asd345	2	19	1	1	1	1	4	0	1	85	6	4	5
65	28/09/2018 12:55:28	asd345	2	19	1	1	1	1	4	0	1	99	5	4	5
66	28/09/2018 12:55:35	asd345	2	20	1	1	1	1	4	0	1	92	9	4	5
67	28/09/2018 12:55:40	asd345	1	19	1	1	1	1	4	0	1	89	7	4	5
68	28/09/2018 12:55:51	asd345	2	25	1	1	1	1	4	0	1	90	5	4	5
69	28/09/2018 12:55:56	asd345	1	20	1	1	1	1	4	0	1	99	5	4	5
70	28/09/2018 12:56:01	asd345	2	24	2	1	1	1	4	0	1	84	8	4	5
71	28/09/2018 12:56:11	asd345	1	20	1	1	1	1	4	0	1	83	6	4	5
72	28/09/2018 12:56:50	asd345	2	20	1	1	1	1	4	0	1	96	6	4	5
73	28/09/2018 12:57:14	asd345	2	21	1	1	1	1	4	0	1	99	7	4	5
74	28/09/2018 12:57:33	asd345	1	21	1	1	1	1	4	0	1	84	8	4	5
75	28/09/2018 12:57:38	asd345	2	20	1	1	1	1	4	0	1	93	9	4	5
76	28/09/2018 12:57:50	asd345	2	20	1	1	1	1	4	0	1	93	4	4	5
77	28/09/2018 12:58:21	asd345	1	20	1	1	1	1	4	0	1	97	6	4	5
78	28/09/2018 12:58:22	asd345	1	20	1	1	1	1	4	0	1	89	4	4	5
79	28/09/2018 12:58:47	asd345	2	20	1	1	1	1	4	0	1	86	5	4	5
80	28/09/2018 12:59:06	asd345	2	19	1	1	1	1	4	0	1	95	8	4	5
81	28/09/2018 12:59:16	asd345	3	21	1	1	1	1	4	0	1	77	3	4	5
82	28/09/2018 12:59:35	asd345	1	20	1	1	1	1	4	0	1	92	4	4	5
83	28/09/2018 12:59:53	asd345	1	22	1	1	1	1	4	0	1	91	9	4	5
84	28/09/2018 13:00:58	asd345	2	21	1	1	1	1	4	0	1	83	5	4	5
85	28/09/2018 13:03:55	asd345	3	23	1	1	1	1	4	1	1	90	4	4	5
86	28/09/2018 13:07:12	asd345	2	20	1	1	1	1	4	0	1	94	7	4	5
87	28/09/2018 13:09:09	asd345	2	23	1	1	1	1	4	0	1	90	5	4	5
88	28/09/2018 13:42:55	asd345	2	22	1	1	1	1	4	0	1	97	6	4	5
89	28/09/2018 13:47:55	asd345	2	20	1	1	1	1	4	0	1	96	7	4	5
91	28/09/2018 14:33:55	asd345	1	24	1	1	1	1	4	0	1	94	9	4	5
92	28/09/2018 14:34:00	asd345	1	24	1	1	1	1	4	0	1	94	9	4	5
93	28/09/2018 15:41:21	asd345	2	20	1	1	1	1	4	0	1	73	5	4	5
94	28/09/2018 16:37:09	asd345	2	20	1	1	1	1	4	0	1	100	6	4	5
95	29/09/2018 00:49:24	asd345	2	20	1	1	1	1	4	0	1	94	5	4	5
96	29/09/2018 11:37:43	asd345	2	20	1	1	1	1	4		1	100	7	4	5
97	25/09/2018 15:41:57	ert234	1	20	1	1	2	2	4	0	1	98	6	4	6
98	25/09/2018 15:42:35	ert234	1	21	1	1	2	2	4	0	1	95	8	4	6
99	25/09/2018 15:42:42	ert234	2	20	1	1	2	2	4	0	1	97	7	4	6
100	25/09/2018 15:42:53	ert234	2	19	1	1	2	2	4	0	1	96	9	4	6
101	25/09/2018 15:43:03	ert234	1	21	1	1	2	2	4	0	1	99	6	4	6
102	25/09/2018 15:43:29	ert234	3	21	1	1	2	2	4	1	1	96	7	4	6
103	25/09/2018 15:43:40	ert234	2	20	1	1	2	2	4	0	1	91	7	4	6
104	25/09/2018 15:43:43	ert234	1	19	1	1	2	2	4	0	1	89	7	4	6
105	25/09/2018 15:44:04	ert234	2	20	1	1	2	2	4	0	1	80	5	4	6
106	25/09/2018 15:44:08	ert234	2	20	1	1	2	2	4	1	1	85	3	4	6
107	25/09/2018 15:44:08	ert234	2	20	1	1	2	2	4	0	1	82	5	4	6
108	25/09/2018 15:44:44	ert234	2	20	1	1	2	2	4	0	1	94	7	4	6
109	25/09/2018 15:44:50	ert234	2	19	1	1	2	2	4	1	1	97	8	4	6
110	25/09/2018 15:44:51	ert234	2	20	1	1	2	2	4	0	1	89	7	4	6
111	25/09/2018 15:44:56	ert234	2	25	2	1	2	2	4	0	1	95	6	4	6
112	25/09/2018 15:45:10	ert234	2	20	1	1	2	2	4	0	1	92	6	4	6
113	25/09/2018 15:45:17	ert234	1	20	1	1	2	2	4	0	1	93	6	4	6
114	25/09/2018 15:45:17	ert234	2	19	1	1	2	2	4	0	1	92	5	4	6
115	25/09/2018 15:45:21	ert234	2	20	1	1	2	2	4		1	82	5	4	6
116	25/09/2018 15:45:34	ert234	1	20	1	1	2	2	4	0	1	97	8	4	6
117	25/09/2018 15:45:34	ert234	2	20	1	1	2	2	4	0	1	77	5	4	6
118	25/09/2018 15:45:50	ert234	2	20	1	1	2	2	4	1	1	78	5	4	6
119	25/09/2018 15:45:53	ert234	2	20	1	1	2	2	4	0	1	96	7	4	6
120	25/09/2018 15:46:03	ert234	2	19	1	1	2	2	4	0	1	98	6	4	6
121	25/09/2018 15:46:05	ert234	2	20	1	1	2	2	4	1	1	81	5	4	6
122	25/09/2018 15:46:49	ert234	2	20	1	1	2	2	4	0	1	99	7	4	6
123	25/09/2018 15:46:53	ert234	2	20	1	1	2	2	4	0	1	93	6	4	6
124	25/09/2018 15:47:00	ert234	2	20	1	1	2	2	4	1	1	87	8	4	6
125	25/09/2018 15:47:03	ert234	2	20	1	1	2	2	4	1	1	83	6	4	6
126	25/09/2018 15:47:11	ert234	2	19	1	1	2	2	4	0	1	80	6	4	6
127	25/09/2018 15:47:30	ert234	2	20	1	1	2	2	4	0	1	96	7	4	6
128	25/09/2018 15:47:38	ert234	2	20	1	1	2	2	4	1	1	90	8	4	6
129	25/09/2018 15:47:49	ert234	2	20	1	1	2	2	4	0	1	94	7	4	6
130	25/09/2018 15:47:51	ert234	2	20	1	1	2	2	4	0	1	94	4	4	6
131	25/09/2018 15:47:52	ert234	1	20	1	1	2	2	4	0	1	84	8	4	6
132	25/09/2018 15:47:58	ert234	1	20	1	1	2	2	4	0	1	95	4	4	6
133	25/09/2018 15:48:00	ert234	1	20	1	1	2	2	4	0	1	78	7	4	6
134	25/09/2018 15:48:04	ert234	2	21	2	1	2	2	4	0	1	85	1	4	6
135	25/09/2018 15:48:06	ert234	2	19	1	1	2	2	4	1	1	84	8	4	6
136	25/09/2018 15:48:29	ert234	1	22	2	1	2	2	4	0	1	99	8	4	6
137	25/09/2018 15:48:44	ert234	2	20	1	1	2	2	4	0	1	93	7	4	6
138	25/09/2018 15:49:09	ert234	2	20	1	1	2	2	4	0	1	96	3	4	6
139	25/09/2018 15:55:34	ert234	1	20	1	1	2	2	4	0	1	83	6	4	6
140	08/10/2018 11:41:36	ert234	1	20	1	1	2	2	1	1	1	79	4	2	6
141	08/10/2018 11:41:41	ert234	1	21	2	2	2	2	1	0	1	79	5	2	6
142	08/10/2018 11:41:51	ert234	2	20	1	1	2	2	1	0	1	81	5	2	6
143	08/10/2018 11:42:10	ert234	1	20	1	1	2	2	1	0	1	86	7	2	6
144	08/10/2018 11:42:20	ert234	1	20	1	1	2	2	1	0	1	96	4	2	6
145	08/10/2018 11:42:46	ert234	2	20	1	1	2	2	1	0	1	82	5	2	6
146	08/10/2018 11:42:50	ert234	1	20	1	1	2	2	1	0	1	94	6	2	6
147	08/10/2018 11:43:06	ert234	2	20	1	1	2	2	1		1	74	3	2	6
148	08/10/2018 11:43:17	ert234	2	20	2	1	2	2	1	0	1	87	4	2	6
149	08/10/2018 11:43:40	ert234	2	21	2	1	2	2	1	0	1	87	6	2	6
150	08/10/2018 11:43:48	ert234	1	20	1	1	2	2	1	0	1	90	6	2	6
151	08/10/2018 11:43:55	ert234	2	20	1	1	2	2	1	1	1	88	5	2	6
152	08/10/2018 11:44:05	ert234	2	24	2	1	2	2	1	0	1	94	2	2	6
154	08/10/2018 11:44:30	ert234	2	19	1	1	2	2	1	0	1	96	8	2	6
155	08/10/2018 11:44:34	ert234	2	20	1	1	2	2	1	0	1	74	3	2	6
156	08/10/2018 11:44:45	ert234	1	20	1	1	2	2	1	0	1	88	4	2	6
157	08/10/2018 11:44:55	ert234	1	20	1	1	2	2	1	0	1	92	7	2	6
158	08/10/2018 11:44:55	ert234	2	21	1	2	2	2	1	0	1	91	3	2	6
159	08/10/2018 11:44:58	ert234	1	20	1	1	2	2	1	0	1	100	6	2	6
160	08/10/2018 11:45:00	ert234	2	20	1	1	2	2	1	0	1	97	6	2	6
161	08/10/2018 11:45:03	ert234	1	20	1	1	2	2	1	0	1	97	6	2	6
162	08/10/2018 11:45:03	ert234	1	19	1	1	2	2	1	0	1	90	9	2	6
163	08/10/2018 11:45:05	ert234	1	20	1	1	2	2	1	0	1	79	2	2	6
165	08/10/2018 11:45:29	ert234	2	19	1	1	2	2	1	1	1	86	7	2	6
166	08/10/2018 11:45:30	ert234	2	20	1	1	2	2	1	0	1	91	4	2	6
167	08/10/2018 11:45:38	ert234	2	20	1	1	2	2	1	1	1	95	7	2	6
168	08/10/2018 11:45:40	ert234	1	20	1	1	2	2	1	1	1	78	2	2	6
169	08/10/2018 11:45:43	ert234	1	23	1	1	2	2	1	0	1	83	4	2	6
170	08/10/2018 11:45:58	ert234	2	19	1	1	2	2	1	0	1	86	7	2	6
171	08/10/2018 11:45:59	ert234	1	20	1	1	2	2	1	0	1	84	7	2	6
172	08/10/2018 11:46:08	ert234	2	21	1	1	2	2	1	1	1	94	2	2	6
173	08/10/2018 11:46:22	ert234	1	31	1	1	2	2	1	0	1	78	3	2	6
174	08/10/2018 11:46:23	ert234	1	23	1	1	2	2	1	0	1	86	3	2	6
175	08/10/2018 11:46:25	ert234	2	21	1	1	2	2	1	0	1	89	7	2	6
176	08/10/2018 11:46:39	ert234	2	21	1	2	2	2	1	1	1	78	6	2	6
177	08/10/2018 11:46:44	ert234	2	19	1	1	2	2	1	0	1	89	6	2	6
178	08/10/2018 11:47:11	ert234	2	20	1	1	2	2	1	0	1	84	4	2	6
179	08/10/2018 11:47:16	ert234	1	20	1	1	2	2	1	0	1	98	7	2	6
180	08/10/2018 11:47:17	ert234	2	20	1	1	2	2	1	0	1	91	7	2	6
181	08/10/2018 11:47:17	ert234	1	20	1	1	2	2	1	0	1	91	6	2	6
182	08/10/2018 11:47:18	ert234	1	20	1	1	2	2	1	0	1	86	7	2	6
183	08/10/2018 11:47:28	ert234	2	20	1	1	2	2	1	1	1	88	6	2	6
184	08/10/2018 11:47:35	ert234	2	20	1	1	2	2	1	0	1	88	7	2	6
185	08/10/2018 11:49:23	ert234	2	22	2	1	2	2	1	0	1	85	5	2	6
186	08/10/2018 11:49:53	ert234	2	21	2	1	2	2	1	0	1	90	3	2	6
187	08/10/2018 11:52:28	ert234	1	21	1	1	2	2	1	1	1	84	8	2	6
188	09/10/2018 09:22:17	ert234	2	27	2	3	2	2	3	0	1	74	4	1	6
190	09/10/2018 09:22:43	ert234	2	20	1	1	2	2	3	0	1	79	5	1	6
191	09/10/2018 09:23:03	ert234	2	23	2	3	2	2	3	0	1	78	5	1	6
192	09/10/2018 09:23:06	ert234	2	20	1	1	2	2	3	0	1	84	2	1	6
193	09/10/2018 09:23:32	ert234	1	24	1	1	2	2	3	0	1	96	7	1	6
194	09/10/2018 09:23:38	ert234	2	20	1	3	2	2	3	1	1	70	6	1	6
195	09/10/2018 09:23:53	ert234	1	23	1	1	2	2	3	0	1	90	5	1	6
196	09/10/2018 09:24:36	ert234	2	24	1	4	2	2	3	0	1	87	4	1	6
197	09/10/2018 09:25:17	ert234	2	20	1	1	2	2	3	0	1	85	6	1	6
198	09/10/2018 09:25:27	ert234	2	21	1	3	2	2	3	1	1	93	7	1	6
200	09/10/2018 09:25:58	ert234	1	21	1	3	2	2	3	0	1	76	2	1	6
201	09/10/2018 09:26:14	ert234	2	20	2	4	2	2	3	0	1	84	4	1	6
202	09/10/2018 09:26:15	ert234	2	20	1	3	2	2	3	0	1	89	3	1	6
203	09/10/2018 09:26:17	ert234	2	21	1	3	2	2	3	0	1	86	6	1	6
204	09/10/2018 09:26:20	ert234	2	20	1	3	2	2	3	0	1	87	5	1	6
205	09/10/2018 09:26:28	ert234	2	21	1	3	2	2	3	0	1	86	6	1	6
206	09/10/2018 09:26:45	ert234	1	22	1	3	2	2	3	0	1	79	5	1	6
207	09/10/2018 09:26:56	ert234	2	20	1	4	2	2	3	0	1	84	4	1	6
208	09/10/2018 09:26:56	ert234	2	21	1	4	2	2	3	0	1	90	3	1	6
209	09/10/2018 09:27:34	ert234	1	20	1	1	2	2	3	1	1	93	6	1	6
210	09/10/2018 09:32:06	ert234	2	29	1	1	2	2	3	0	1	67	1	1	6
211	09/10/2018 09:40:46	ert234	1	24	1	3	2	2	3	0	1	86	5	1	6
213	09/10/2018 11:21:12	ert234	1	20	1	3	2	2	2	0	1	89	7	3	6
214	09/10/2018 11:21:12	ert234	1	20	1	3	2	2	2	0	1	85	6	3	6
215	09/10/2018 11:21:30	ert234	1	20	1	3	2	2	2	0	1		3	3	6
216	09/10/2018 11:21:32	ert234	1	20	1	3	2	2	2	1	1	76	2	3	6
218	09/10/2018 11:24:03	ert234	2	20	1	3	2	2	2	0	1	89	1	3	6
219	09/10/2018 11:24:19	ert234	2	20	1	1	2	2	2	0	1	100	6	3	6
220	09/10/2018 11:24:25	ert234	1	19	1	1	2	2	2	0	1	85	7	3	6
221	09/10/2018 11:24:52	ert234	2	20	1	3	2	2	2	0	1	66	3	3	6
222	09/10/2018 11:25:15	ert234	1	20	1	3	2	2	2	0	1	82	4	3	6
223	09/10/2018 11:26:09	ert234	1	23	1	1	2	2	2	0	1	88	5	3	6
224	09/10/2018 11:27:02	ert234	1	49	1	3	2	2	2	0	1	99	4	3	6
225	24/10/2018 11:48	hjk379	3	20	1	1	3	3	4	0	1	99	6	4	8
226	24/10/2018 11:49	hjk379	1	20	1	1	3	3	4	0	1	95	7	4	8
227	24/10/2018 11:49	hjk379	1	21	1	1	3	3	4	0	1	92	7	4	8
228	24/10/2018 11:49	hjk379	1	20	1	1	3	3	4	0	1	100	10	4	8
229	24/10/2018 11:49	hjk379	1	20	1	1	3	3	4	0	1	100	8	4	8
230	24/10/2018 11:50	hjk379	1	21	1	1	3	3	4	0	1	77	4	4	8
231	24/10/2018 11:50	hjk379	2	21	1	1	3	3	4	0	1	99	9	4	8
232	24/10/2018 11:50	hjk379	2	20	1	1	3	3	4	0	1	99	4	4	8
233	24/10/2018 11:50	hjk379	1	20	1	1	3	3	4	0	1	82	6	4	8
234	24/10/2018 11:50	hjk379	1	19	1	1	3	3	4	0	1	96	7	4	8
235	24/10/2018 11:50	hjk379	2	19	1	1	3	3	4	0	1	72	4	4	8
236	24/10/2018 11:50	hjk379	2	20	1	1	3	3	4	0	1	77	5	4	8
237	24/10/2018 11:50	hjk379	2	20	1	1	3	3	4	0	1	90	7	4	8
238	24/10/2018 11:51	hjk379	2	20	1	1	3	3	4	0	1	100	7	4	8
239	24/10/2018 11:51	hjk379	1	20	1	1	3	3	4	0	1	95	7	4	8
240	24/10/2018 11:51	hjk379	1	20	1	1	3	3	4	0	1	97	6	4	8
241	24/10/2018 11:51	hjk379	2	22	1	1	3	3	4	0	1	93	4	4	8
242	24/10/2018 11:51	hjk379	2	20	1	1	3	3	4	0	1	96	7	4	8
243	24/10/2018 11:51	hjk379	1	19	1	1	3	3	4	0	1	88	7	4	8
244	24/10/2018 11:52	hjk379	2	20	1	1	3	3	4	0	1	89	7	4	8
245	24/10/2018 11:52	hjk379	1	26	2	1	3	3	4	0	1	97	8	4	8
246	24/10/2018 11:52	hjk379	1	20	1	1	3	3	4	0	1	100	3	4	8
247	24/10/2018 11:52	hjk379	2	20	1	1	3	3	4	0	1	100	8	4	8
248	24/10/2018 11:52	hjk379	1	22	1	1	3	3	4	0	1	91	8	4	8
249	24/10/2018 11:52	hjk379	1	20	1	1	3	3	4	0	1	93	6	4	8
250	24/10/2018 11:52	hjk379	1	20	1	1	3	3	4	0	1	100	8	4	8
251	24/10/2018 11:53	hjk379	1	20	1	1	3	3	4	0	1	87	7	4	8
252	24/10/2018 11:53	hjk379	2	20	1	1	3	3	4	0	1	90	4	4	8
253	24/10/2018 11:53	hjk379	2	23	1	1	3	3	4	0	1	93	6	4	8
254	24/10/2018 11:53	hjk379	1	29	1	1	3	3	4	0	1	94	6	4	8
255	24/10/2018 11:53	hjk379	1	20	1	1	3	3	4	0	1	99	7	4	8
256	24/10/2018 11:53	hjk379	1	20	1	1	3	3	4	1	1	86	5	4	8
257	24/10/2018 11:53	hjk379	2	20	1	1	3	3	4	0	1	84	7	4	8
258	24/10/2018 11:54	hjk379	1	23	1	1	3	3	4	0	1	83	3	4	8
259	24/10/2018 11:54	hjk379	2	19	1	1	3	3	4	0	1	86	8	4	8
260	24/10/2018 11:54	hjk379	2	20	1	1	3	3	4	0	1	89	7	4	8
261	24/10/2018 11:54	hjk379	1	20	1	1	3	3	4	0	1	91	8	4	8
262	24/10/2018 11:54	hjk379	1	20	1	1	3	3	4	0	1	83	8	4	8
263	24/10/2018 11:54	hjk379	2	19	1	1	3	3	4	0	1	99	7	4	8
264	24/10/2018 11:56	hjk379	2	21	1	1	3	3	4	0	1	86	5	4	8
265	24/10/2018 11:57	hjk379	1	20	1	1	3	3	4	0	1	100	5	4	8
266	24/10/2018 11:57	hjk379	2	21	1	1	3	3	4	0	1	84	5	4	8
267	24/10/2018 11:57	hjk379	1	20	1	1	3	3	4	0	1	100	8	4	8
268	24/10/2018 19:33	hjk379	1	20	1	1	3	3	4	0	1	90	5	4	8
270	25/10/2018 11:03	hjk379	1	20	1	1	3	3	1	0	1	84	7	2	8
271	25/10/2018 11:04	hjk379	1	20	1	1	3	3	1	0	1	95	6	2	8
272	25/10/2018 11:05	hjk379	1	20	1	1	3	3	1	0	1	87	5	2	8
273	25/10/2018 11:05	hjk379	2	22	1	1	3	3	1	0	1	93	4	2	8
274	25/10/2018 11:05	hjk379	1	22	1	1	3	3	1	0	1	99	4	2	8
275	25/10/2018 11:06	hjk379	1	22	1	1	3	3	1	0	1	86	5	2	8
276	25/10/2018 11:06	hjk379	2	20	1	1	3	3	1	0	1	89	6	2	8
277	25/10/2018 11:07	hjk379	2	21	1	1	3	3	1	1	1	86	4	2	8
278	25/10/2018 11:07	hjk379	1	19	2	1	3	3	1	0	1	88	6	2	8
279	25/10/2018 11:07	hjk379	2	19	1	1	3	3	1	1	1	82	4	2	8
280	25/10/2018 11:07	hjk379	1	22	1	1	3	3	1	0	1	86	5	2	8
281	25/10/2018 11:08	hjk379	1	20	1	1	3	3	1	0	1	96	3	2	8
282	25/10/2018 11:09	hjk379	1	20	1	1	3	3	1	0	1	77	9	2	8
283	25/10/2018 11:09	hjk379	1	19	1	1	3	3	1	0	1	71	3	2	8
284	25/10/2018 11:11	hjk379	2	20	1	1	3	3	1	0	1	75	6	2	8
285	25/10/2018 11:12	hjk379	1	21	1	1	3	3	1	1	1	71	3	2	8
286	25/10/2018 11:12	hjk379	1	20	1	1	3	3	1	0	1	70	5	2	8
287	25/10/2018 11:13	hjk379	1	23	1	1	3	3	1	0	1	92	7	2	8
288	25/10/2018 12:15	hjk379	2	21	1	3	3	3	3	0	1	68	3	1	8
289	25/10/2018 12:15	hjk379	1	20	1	3	3	3	3	0	1	83	4	1	8
290	25/10/2018 12:17	hjk379	2	20	1	4	3	3	3	0	1	95	4	1	8
291	25/10/2018 12:17	hjk379	2	23	1	1	3	3	3	0	1	98	6	1	8
292	25/10/2018 12:18	hjk379	1	20	1	4	3	3	3	0	1	73	4	1	8
294	25/10/2018 12:19	hjk379	1	20	1	4	3	3	3	0	1	97	5	1	8
297	25/10/2018 12:20	hjk379	1	20	1	3	3	3	3	0	1	88	4	1	8
299	25/10/2018 12:20	hjk379	2	20	1	3	3	3	3	0	1	87	6	1	8
300	25/10/2018 12:22	hjk379	2	20	1	4	3	3	3	1	1	64	3	1	8
301	25/10/2018 12:22	hjk379	1	22	1	3	3	3	3	0	1	88	3	1	8
302	07/11/2018 17:57	hjk379	1	22	1	4	3	3	2	0	1	95	4	3	8
303	07/11/2018 17:57	hjk379	1	20	1	2	3	3	2	0	1	52	2	3	8
306	07/11/2018 17:59	hjk379	2	20	1	3	3	3	2	0	1	64	1	3	8
307	07/11/2018 18:01	hjk379	1	21	1	3	3	3	2	0	1	79	6	3	8
308	07/11/2018 18:01	hjk379	2	20	1	5	3	3	2	0	1	91	6	3	8
309	07/11/2018 18:01	hjk379	1	21	1	2	3	3	2	0	1	99	6	3	8
310	07/11/2018 18:01	hjk379	2	23	1	3	3	3	2	0	1	67	1	3	8
311	07/11/2018 18:01	hjk379	1	21	1	4	3	3	2	0	1	93	2	3	8
312	07/11/2018 18:02	hjk379	2	20	1	3	3	3	2	0	1	95	5	3	8
313	07/11/2018 18:02	hjk379	1	21	1	3	3	3	2	0	1	96	6	3	8
314	07/11/2018 18:02	hjk379	1	21	1	3	3	3	2	0	1	96	6	3	8
315	07/11/2018 18:02	hjk379	1	27	1	4	3	3	2	0	1	87	5	3	8
316	07/11/2018 18:02	hjk379	1	27	2	4	3	3	2	1	1	79	5	3	8
317	07/11/2018 18:02	hjk379	1	20	1	3	3	3	2	1	1	98	7	3	8
318	07/11/2018 18:02	hjk379	1	20	1	3	3	3	2	0	1	76	3	3	8
319	07/11/2018 18:03	hjk379	1	20	1	4	3	3	2	0	1	77	6	3	8
320	07/11/2018 18:03	hjk379	1	19	2	3	3	3	2	0	1	95	6	3	8
321	07/11/2018 18:03	hjk379	2	22	1	3	3	3	2	0	1	94	6	3	8
322	07/11/2018 18:03	hjk379	1	19	1	3	3	3	2	1	1	82	3	3	8
323	07/11/2018 18:03	hjk379	1	20	1	3	3	3	2	0	1	89	3	3	8
324	07/11/2018 18:03	hjk379	2	20	1	3	3	3	2	0	1	92	5	3	8
325	07/11/2018 18:03	hjk379	2	20	1	3	3	3	2	1	1	92	4	3	8
326	07/11/2018 18:03	hjk379	2	20	1	4	3	3	2	0	1	91	5	3	8
330	07/11/2018 18:06	hjk379	1	20	1	3	3	3	2	0	1	82	7	3	8
331	07/11/2018 18:06	hjk379	1	20	1	3	3	3	2	0	1	92	1	3	8
332	07/11/2018 18:15	hjk379	2	20	1	4	3	3	2	0	1	95	8	3	8
333	07/11/2018 18:31	hjk379	1	28	1	3	3	3	2	0	1	94	5	3	8
430	12/12/2018 12:01	vbf456	1	20	1	4	5	4	2	1	1	85	6	3	10
431	12/12/2018 12:02	vbf456	1	20	1	3	5	4	2	0	1	90	4	3	10
432	12/12/2018 12:02	vbf456	3	22	1	4	5	4	2	0	1	75	1	3	10
433	12/12/2018 12:04	vbf456	1	24	1	3	5	4	2	0	1	92	5	3	10
434	12/12/2018 12:04	vbf456	1	20	1	4	5	4	2	0	1	96	2	3	10
435	12/12/2018 12:05	vbf456	1	20	1	2	5	4	2	0	1	93	5	3	10
436	12/12/2018 12:05	vbf456	1	20	1	4	5	4	2	1	1	90	5	3	10
437	12/12/2018 12:05	vbf456	2	20	1	3	5	4	2	0	1	78	2	3	10
438	12/12/2018 12:06	vbf456	2	29	2	1	5	4	2	0	1	95	4	3	10
439	12/12/2018 12:06	vbf456	1	19	1	3	5	4	2	0	1	89	5	3	10
440	12/12/2018 12:06	vbf456	1	20	1	3	5	4	2	0	1	92	4	3	10
441	12/12/2018 12:06	vbf456	1	22	1	4	5	4	2	1	1	98	5	3	10
442	12/12/2018 12:08	vbf456	1	20	1	4	5	4	2	1	1	89	2	3	10
444	12/12/2018 12:12	vbf456	1	23	1	2	5	4	2	0	1	87	7	3	10
445	12/12/2018 12:13	vbf456	1	20	1	3	5	4	2	0	1	97	8	3	10
446	12/12/2018 12:13	vbf456	2	20	1	3	5	4	2	1	1	96	9	3	10
447	12/12/2018 12:21	vbf456	3	43	1	1	5	4	2	1	1	74	3	3	10
448	12/12/2018 12:59	vbf456	2	20	1	1	5	4	4	0	1	90	4	4	10
449	12/12/2018 13:01	vbf456	2	20	1	1	5	4	4	0	1	84	7	4	10
450	12/12/2018 13:01	vbf456	2	21	1	1	5	4	4	0	1	90	4	4	10
451	12/12/2018 13:01	vbf456	1	20	1	1	5	4	4	0	1	99	9	4	10
452	12/12/2018 13:02	vbf456	2	22	1	1	5	4	4	0	1	84	6	4	10
453	12/12/2018 13:02	vbf456	1	19	1	1	5	4	4	0	1	93	6	4	10
454	12/12/2018 13:02	vbf456	2	20	1	1	5	4	4	0	1	93	4	4	10
455	12/12/2018 13:02	vbf456	1	20	1	1	5	4	4	0	1	97	6	4	10
456	12/12/2018 13:02	vbf456	2	21	1	1	5	4	4	0	1	93	6	4	10
457	12/12/2018 13:02	vbf456	1	20	1	1	5	4	4	0	1	93	9	4	10
458	12/12/2018 13:02	vbf456	2	21	1	1	5	4	4	0	1	94	3	4	10
459	12/12/2018 13:02	vbf456	2	20	1	1	5	4	4	1	1	91	6	4	10
460	12/12/2018 13:03	vbf456	2	20	1	1	5	4	4	1	1	95	9	4	10
461	12/12/2018 13:03	vbf456	2	20	1	1	5	4	4	0	1	90	6	4	10
462	12/12/2018 13:03	vbf456	2	20	1	1	5	4	4	0	1	99	10	4	10
463	12/12/2018 13:04	vbf456	1	21	1	1	5	4	4	0	1	82	3	4	10
464	12/12/2018 13:04	vbf456	2	20	1	1	5	4	4	0	1	95	5	4	10
465	12/12/2018 13:04	vbf456	2	21	1	1	5	4	4	0	1	91	5	4	10
466	12/12/2018 13:04	vbf456	1	20	1	1	5	4	4	0	1	82	5	4	10
467	12/12/2018 13:04	vbf456	2	21	1	1	5	4	4	0	1	92	7	4	10
468	12/12/2018 13:04	vbf456	2	20	1	1	5	4	4	0	1	78	4	4	10
469	12/12/2018 13:05	vbf456	2	20	1	1	5	4	4	0	1	85	5	4	10
470	12/12/2018 13:05	vbf456	1	20	2	1	5	4	4	0	1	98	7	4	10
471	12/12/2018 13:06	vbf456	2	19	1	1	5	4	4	0	1	88	6	4	10
472	12/12/2018 13:06	vbf456	1	20	1	1	5	4	4	0	1	83	7	4	10
473	12/12/2018 13:07	vbf456	2	20	1	1	5	4	4	0	1	81	7	4	10
474	12/12/2018 13:07	vbf456	1	20	1	1	5	4	4	1	1	83	7	4	10
475	12/12/2018 13:07	vbf456	2	21	1	1	5	4	4	0	1	92	6	4	10
476	12/12/2018 13:07	vbf456	2	20	1	1	5	4	4	0	1	90	8	4	10
477	12/12/2018 13:07	vbf456	2	20	1	1	5	4	4	0	1	98	6	4	10
478	12/12/2018 13:08	vbf456	1	24	1	1	5	4	4	0	1	90	7	4	10
479	12/12/2018 13:08	vbf456	2	21	1	1	5	4	4	1	1	80	5	4	10
480	12/12/2018 13:08	vbf456	2	20	1	1	5	4	4	0	1	84	4	4	10
481	12/13/2018 16:18:14	vbf456	2	21	2	3	5	4	3	1	1	86	4	1	10
482	12/13/2018 16:19:09	vbf456	2	20	1	3	5	4	3	0	1	74	4	1	10
483	12/13/2018 16:19:40	vbf456	2	22	1	3	5	4	3	0	1	90	4	1	10
484	12/13/2018 16:20:12	vbf456	2	21	1	3	5	4	3	0	1	91	5	1	10
486	12/13/2018 16:22:44	vbf456	2	21	2	3	5	4	3	1	1	85	5	1	10
487	12/13/2018 16:22:53	vbf456	2	21	2	3	5	4	3		1	100	3	1	10
489	12/13/2018 16:26:13	vbf456	2	21	1	3	5	4	3	0	1	85	3	1	10
490	12/18/2018 12:26:06	vbf456	3	23	2	1	5	4	1	0	1	79	5	2	10
491	12/18/2018 12:26:25	vbf456	1	21	1	1	5	4	1	0	1	97	7	2	10
492	12/18/2018 12:26:27	vbf456	2	20	1	1	5	4	1	1	1	91	4	2	10
493	12/18/2018 12:26:35	vbf456	2	20	1	2	5	4	1	0	1	85	4	2	10
494	12/18/2018 12:26:36	vbf456	1	21	1	1	5	4	1	0	1	100	6	2	10
495	12/18/2018 12:26:50	vbf456	1	20	1	1	5	4	1	1	1	90	6	2	10
496	12/18/2018 12:27:09	vbf456	1	20	1	1	5	4	1	0	1	99	4	2	10
497	12/18/2018 12:27:26	vbf456	1	20	1	1	5	4	1	0	1	100	7	2	10
498	12/18/2018 12:27:30	vbf456	2	20	1	1	5	4	1	0	1	86	6	2	10
499	12/18/2018 12:27:38	vbf456	1	20	1	1	5	4	1	0	1	100	5	2	10
500	12/18/2018 12:27:53	vbf456	2	20	1	1	5	4	1	0	1	96	9	2	10
501	12/18/2018 12:28:16	vbf456	1	20	1	1	5	4	1	1	1	79	5	2	10
502	12/18/2018 12:28:22	vbf456	2	20	1	1	5	4	1	0	1	100	7	2	10
503	12/18/2018 12:28:39	vbf456	1	26	1	1	5	4	1	0	1	80	3	2	10
504	12/18/2018 12:28:54	vbf456	1	21	1	1	5	4	1	0	1	94	5	2	10
505	12/18/2018 12:28:59	vbf456	1	20	1	1	5	4	1	0	1	92	6	2	10
506	12/18/2018 12:29:30	vbf456	2	21	2	1	5	4	1	0	1	75	5	2	10
507	12/18/2018 12:29:50	vbf456	1	25	1	1	5	4	1	0	1	100	6	2	10
508	12/18/2018 12:30:05	vbf456	2	24	1	1	5	4	1	0	1	86	6	2	10
509	12/18/2018 12:30:32	vbf456	2	22	1	1	5	4	1	1	1	96	5	2	10
510	12/18/2018 12:32:21	vbf456	2	23	1	1	5	4	1	0	1	94	7	2	10
511	12/18/2018 12:32:21	vbf456	1	21	1	1	5	4	1	1	1	90	9	2	10
512	12/18/2018 12:32:36	vbf456	2	28	1	1	5	4	1	0	1	94	4	2	10
513	12/18/2018 14:45:40	vbf456	2	21	1	1	5	4	1	1	1		4	2	10
514	12/18/2018 14:48:19	vbf456	2	28	1	1	5	4	1	0	1	94	4	2	10
699	12/05/2018 16:14	asd345	1	20	1	1	5	6	4	0	1	88	7	4	3
700	12/05/2018 16:15	asd345	2	21	1	1	5	6	4	0	1	95	7	4	3
702	12/05/2018 16:17	asd345	2	20	1	1	5	6	4	0	1	97	5	4	3
703	12/05/2018 16:17	asd345	2	22	1	1	5	6	4	0	1	96	5	4	3
704	12/05/2018 16:17	asd345	2	22	1	1	5	6	4	0	1	96	7	4	3
705	12/05/2018 16:17	asd345	2	20	1	1	5	6	4	0	1	85	4	4	3
706	12/05/2018 16:17	asd345	2	20	1	1	5	6	4	0	1	83	7	4	3
707	12/05/2018 16:18	asd345	2	27	1	1	5	6	4	0	1	92	6	4	3
708	12/05/2018 16:19	asd345	2	21	1	1	5	6	4	0	1	90	8	4	3
709	12/05/2018 16:20	asd345	2	20	1	1	5	6	4	0	1	87	8	4	3
710	12/05/2018 16:20	asd345	1	20	1	1	5	6	4	0	1	95	4	4	3
711	12/05/2018 16:22	asd345	2	20	1	1	5	6	4	0	1	93	7	4	3
712	12/05/2018 16:22	asd345	2	20	1	1	5	6	4	0	1	74	4	4	3
713	12/05/2018 16:31	asd345	2	23	2	1	5	6	4	0	1	79	5	4	3
714	12/13/2018 18:16:25	asd345	1	20	2	1	5	6	4	0	1	96	5	4	3
715	12/13/2018 18:17:37	asd345	1	20	2	1	5	6	4	0	1	90	7	4	3
716	12/13/2018 18:18:36	asd345	2	22	2	1	5	6	4	0	1	77	3	4	3
717	12/13/2018 18:19:39	asd345	1	24	2	1	5	6	4	0	1	95	5	4	3
719	12/13/2018 18:20:23	asd345	2	21	2	1	5	6	4	0	1	87	5	4	3
720	12/13/2018 18:20:53	asd345	2	20	2	1	5	6	4	0	1	93	6	4	3
721	12/13/2018 18:21:04	asd345	1	20	1	1	5	6	4	0	1	100	7	4	3
722	12/13/2018 18:21:09	asd345	2	19	2	1	5	6	4	0	1	73	5	4	3
723	12/13/2018 18:21:17	asd345	2	20	2	1	5	6	4	0	1	96	6	4	3
724	12/13/2018 18:21:21	asd345	2	20	2	1	5	6	4	0	1	97	5	4	3
725	12/13/2018 18:22:01	asd345	1	19	2	1	5	6	4	0	1	100	8	4	3
726	12/13/2018 18:22:19	asd345	2	20	2	1	5	6	4	0	1	97	6	4	3
727	12/13/2018 18:22:22	asd345	2	20	2	1	5	6	4	0	1	93	4	4	3
728	12/13/2018 18:22:52	asd345	1	20	1	1	5	6	4	0	1	99	8	4	3
729	12/13/2018 18:22:57	asd345	2	20	2	1	5	6	4	0	1	97	4	4	3
730	12/13/2018 18:22:58	asd345	2	20	2	1	5	6	4	0	1	75	5	4	3
731	12/13/2018 18:23:28	asd345	1	20	2	1	5	6	4	0	1	94	5	4	3
732	12/13/2018 18:24:08	asd345	2	20	2	1	5	6	4	0	1	86	7	4	3
733	12/13/2018 18:30:58	asd345	1	20	1	1	5	6	4	0	1	92	5	4	3
734	12/18/2018 16:12:07	asd345	1	20	1	1	5	6	1	1	1	77	3	2	3
735	12/18/2018 16:13:29	asd345	2	20	1	1	5	6	1	1	1	74	5	2	3
736	12/18/2018 16:13:46	asd345	2	26	2	1	5	6	1	0	1	85	6	2	3
737	12/18/2018 16:14:22	asd345	1	21	1	1	5	6	1	0	1	89	4	2	3
738	12/18/2018 16:15:40	asd345	2	20	1	1	5	6	1	1	1	86	5	2	3
740	12/18/2018 16:15:52	asd345	2	20	1	2	5	6	1	1	1	83	3	2	3
741	12/18/2018 16:15:57	asd345	2	20	1	1	5	6	1	0	1	75	5	2	3
742	12/18/2018 16:16:03	asd345	1	20	1	2	5	6	1	0	1	88	6	2	3
743	12/18/2018 16:16:31	asd345	2	20	1	1	5	6	1	0	1	75	5	2	3
744	12/18/2018 16:16:55	asd345	1	20	1	1	5	6	1	0	1	97	5	2	3
745	12/18/2018 16:16:57	asd345	2	20	2	2	5	6	1	0	1	85	3	2	3
746	12/18/2018 16:17:13	asd345	1	20	1	1	5	6	1	0	1	88	6	2	3
747	12/18/2018 16:17:24	asd345	2	22	1	2	5	6	1	1	1	85	6	2	3
748	12/18/2018 16:17:43	asd345	1	22	1	1	5	6	1	1	1	96	6	2	3
749	12/18/2018 16:17:47	asd345	2	22	1	1	5	6	1	0	1	81	2	2	3
750	12/18/2018 16:17:58	asd345	1	21	1	1	5	6	1	0	1	73	5	2	3
751	12/18/2018 16:18:05	asd345	2	20	1	1	5	6	1	0	1	84	3	2	3
752	12/18/2018 16:18:29	asd345	2	20	1	1	5	6	1	1	1	73	2	2	3
753	12/18/2018 16:18:50	asd345	2	22	1	1	5	6	1	0	1	87	6	2	3
754	12/18/2018 16:19:17	asd345	2	20	1	1	5	6	1	0	1	81	5	2	3
755	12/18/2018 16:19:20	asd345	2	22	1	1	5	6	1	0	1	87	6	2	3
756	12/18/2018 16:19:23	asd345	2	22	1	1	5	6	1	0	1	77	6	2	3
757	12/18/2018 16:19:58	asd345	2	21	1	1	5	6	1	0	1	79	4	2	3
758	12/19/2018 12:03:51	asd345	1	20	1	1	5	6	4	0	1	95	9	4	3
759	12/19/2018 12:04:07	asd345	1	21	1	1	5	6	4	0	1	97	4	4	3
760	12/19/2018 12:04:10	asd345	2	20	1	1	5	6	4	0	1	87	7	4	3
761	12/19/2018 12:04:34	asd345	1	21	1	1	5	6	4	0	1	91	8	4	3
762	12/19/2018 12:04:36	asd345	2	20	1	1	5	6	4	0	1	87	5	4	3
763	12/19/2018 12:04:50	asd345	2	23	1	1	5	6	4	0	1	84	6	4	3
764	12/19/2018 12:05:00	asd345	1	20	1	1	5	6	4	1	1	88	4	4	3
765	12/19/2018 12:05:37	asd345	1	21	1	1	5	6	4	0	1	96	7	4	3
766	12/19/2018 12:05:57	asd345	1	20	1	1	5	6	4	0	1	99	8	4	3
767	12/19/2018 12:06:00	asd345	2	20	1	1	5	6	4	1	1	84	7	4	3
768	12/19/2018 12:06:38	asd345	2	20	1	1	5	6	4	0	1	93	9	4	3
769	12/19/2018 12:06:59	asd345	2	20	1	1	5	6	4	0	1	95	7	4	3
770	12/19/2018 12:07:06	asd345	1	21	1	1	5	6	4	0	1	96	9	4	3
771	12/19/2018 12:07:30	asd345	2	21	1	1	5	6	4	0	1	87	7	4	3
772	12/19/2018 12:07:43	asd345	2	24	1	1	5	6	4	0	1	91	7	4	3
773	12/19/2018 12:08:06	asd345	2	20	1	1	5	6	4	0	1	89	7	4	3
774	12/19/2018 12:08:14	asd345	2	21	1	1	5	6	4	0	1	92	7	4	3
775	12/19/2018 12:08:19	asd345	2	20	1	1	5	6	4	0	1	99	7	4	3
776	12/19/2018 12:08:20	asd345	1	20	1	1	5	6	4	0	1	85	7	4	3
777	12/19/2018 12:08:40	asd345	2	20	1	1	5	6	4	0	1	99	8	4	3
778	12/19/2018 12:08:47	asd345	1	20	1	1	5	6	4	0	1	95	6	4	3
779	12/19/2018 12:08:59	asd345	1	20	1	1	5	6	4	0	1	95	7	4	3
780	12/19/2018 12:09:14	asd345	1	21	1	1	5	6	4	0	1	99	7	4	3
781	12/19/2018 12:09:20	asd345	2	20	1	1	5	6	4	1	1	83	10	4	3
782	12/19/2018 12:09:32	asd345	2	21	1	1	5	6	4	0	1	88	10	4	3
783	12/19/2018 12:10:58	asd345	2	20	1	1	5	6	4	0	1	89	7	4	3
785	3/20/2019 17:49:46	asd345	1	28	2	3	5	6	2	0	1	64	1	3	3
789	3/20/2019 17:53:43	asd345	1	23	1	4	5	6	2	1	1	74	7	3	3
790	3/20/2019 17:53:50	asd345	1	22	1	3	5	6	2	0	1	84	4	3	3
792	3/20/2019 17:53:54	asd345	2	20	2	3	5	6	2	0	1	80	5	3	3
793	3/20/2019 17:54:18	asd345	1	21	2	4	5	6	2	1	1	81	2	3	3
794	3/20/2019 17:54:25	asd345	2	22	1	1	5	6	2	0	1	98	5	3	3
795	3/20/2019 17:54:32	asd345	2	21	2	3	5	6	2	0	1	87	5	3	3
796	3/20/2019 17:54:42	asd345	1	24	2	3	5	6	2	1	1	83	3	3	3
797	3/20/2019 17:54:45	asd345	1	20	1	4	5	6	2	0	1	84	4	3	3
799	3/20/2019 17:54:54	asd345	2	21	1	4	5	6	2	0	1	77	3	3	3
800	3/20/2019 17:55:16	asd345	1	20	1	3	5	6	2	0	1	82	2	3	3
801	3/20/2019 17:55:20	asd345	1	23	1	3	5	6	2	0	1	92	4	3	3
802	3/20/2019 17:55:26	asd345	1	20	1	4	5	6	2	0	1	83	5	3	3
803	3/20/2019 17:55:43	asd345	2	35	2	2	5	6	2	0	1	88	8	3	3
804	3/20/2019 17:55:45	asd345	2	23	2	4	5	6	2	0	1	94	6	3	3
805	3/20/2019 17:55:55	asd345	1	24	1	4	5	6	2	0	1	90	5	3	3
806	3/20/2019 17:56:02	asd345	1	22	1	4	5	6	2	0	1	87	6	3	3
807	3/20/2019 17:56:38	asd345	2	24	1	4	5	6	2	0	1	78	4	3	3
808	3/20/2019 17:56:47	asd345	2	20	2	3	5	6	2	0	1	89	3	3	3
809	3/20/2019 17:57:07	asd345	2	20	1	3	5	6	2	0	1	84	6	3	3
810	3/20/2019 17:57:26	asd345	1	28	2	4	5	6	2	0	1	82	5	3	3
812	3/20/2019 17:57:48	asd345	1	23	1	2	5	6	2	0	1	86	5	3	3
813	3/20/2019 17:58:02	asd345	2	21	1	4	5	6	2	0	1	72	6	3	3
814	3/20/2019 17:58:51	asd345	2	24	2	3	5	6	2	0	1	86	2	3	3
815	3/20/2019 17:59:27	asd345	2	22	1	3	5	6	2	0	1	74	5	3	3
816	3/20/2019 18:00:03	asd345	2	23	1	4	5	6	2	0	1	85	4	3	3
817	3/20/2019 18:00:14	asd345	1	23	1	5	5	6	2	1	1	85	5	3	3
818	3/20/2019 18:00:44	asd345	1	31	1	3	5	6	2	0	1	92	3	3	3
819	3/20/2019 18:02:25	asd345	1	23	1	3	5	6	2	0	1	73	4	3	3
820	3/20/2019 18:03:04	asd345	1	36	1	3	5	6	2	0	1	73	6	3	3
823	04/10/2019 17:23	asd345	2	22	1	3	5	6	3	1	1	70	2	1	3
824	04/10/2019 17:24	asd345	2	22	1	3	5	6	3	0	1	67	3	1	3
825	04/10/2019 17:25	asd345	2	23	2	3	5	6	3	0	1	73	2	1	3
826	04/10/2019 17:25	asd345	2	20	1	3	5	6	3	0	1	82	6	1	3
827	04/10/2019 17:25	asd345	1	20	2	4	5	6	3	1	1	71	4	1	3
828	04/10/2019 17:25	asd345	1	21	1	1	5	6	3	1	1	77	5	1	3
829	04/10/2019 17:26	asd345	1	22	1	3	5	6	3	0	1	94	3	1	3
830	04/10/2019 17:26	asd345	2	20	1	3	5	6	3	0	1	86	3	1	3
831	04/10/2019 17:26	asd345	2	20	1	3	5	6	3	0	1	97	6	1	3
832	04/10/2019 17:26	asd345	2	21	1	3	5	6	3	0	1	74	6	1	3
833	04/10/2019 17:26	asd345	1	21	2	3	5	6	3	0	1	91	1	1	3
834	04/10/2019 17:26	asd345	2	20	1	3	5	6	3	0	1	83	3	1	3
835	04/10/2019 17:27	asd345	2	20	1	3	5	6	3	1	1	74	5	1	3
836	04/10/2019 17:27	asd345	2	20	2	3	5	6	3	0	1	74	6	1	3
837	04/10/2019 17:27	asd345	2	24	1	3	5	6	3	0	1	94	3	1	3
838	04/10/2019 17:28	asd345	1	22	1	3	5	6	3	0	1	92	7	1	3
839	04/10/2019 17:28	asd345	2	20	2	3	5	6	3	0	1	81	4	1	3
605	11/28/2018 10:41:39	wer443	1	20	1	4	3	7	2	0	1	85	5	3	4
606	11/28/2018 10:42:43	wer444	1	22	1	1	3	7	2	0	1	94	5	3	4
607	11/28/2018 10:43:29	wer445	1	20	1	3	3	7	2	0	1	86	5	3	4
608	11/28/2018 10:43:48	wer446	1	20	1	3	3	7	2	0	1	86	6	3	4
609	11/28/2018 10:45:22	wer447	1	20	1	3	3	7	2	1	1	92	5	3	4
610	11/28/2018 10:45:45	wer448	2	20	1	4	3	7	2	0	1	80	6	3	4
611	11/28/2018 10:45:51	wer449	1	23	1	4	3	7	2	0	1	89	3	3	4
612	11/28/2018 10:45:59	wer450	1	20	1	3	3	7	2	0	1	78	3	3	4
613	11/28/2018 10:48:46	wer451	1	20	1	4	3	7	2	0	1	79	8	3	4
614	11/28/2018 10:49:23	wer452	1	61	1	3	3	7	2	0	1	93	3	3	4
615	11/28/2018 10:49:46	wer453	1	21	1	3	3	7	2	0	1	88	6	3	4
616	11/28/2018 10:49:49	wer454	2	20	1	3	3	7	2	0	1	91	6	3	4
617	11/28/2018 10:56:02	wer455	1	20	1	1	3	7	2	0	1	92	9	3	4
618	12/11/2018 9:49	wer456	2	20	1	5	3	7	3	1	1	66	2	1	4
619	12/11/2018 9:50	wer456	2	21	1	3	3	7	3	0	1	84	4	1	4
620	12/11/2018 9:52	wer456	2	20	1	3	3	7	3	0	1	90	2	1	4
621	12/11/2018 9:52	wer456	2	20	1	3	3	7	3	1	1	84	6	1	4
622	12/11/2018 9:52	wer456	1	20	1	3	3	7	3	0	1	82	4	1	4
623	12/11/2018 9:52	wer456	2	21	1	3	3	7	3	0	1	80	3	1	4
625	12/11/2018 9:53	wer456	2	21	1	3	3	7	3	1	1	69	2	1	4
626	12/11/2018 9:53	wer456	1	21	1	1	3	7	3	0	1	96	4	1	4
627	12/11/2018 9:53	wer456	1	19	1	3	3	7	3	0	1	96	5	1	4
628	12/11/2018 9:54	wer456	2	26	1	3	3	7	3	0	1	87	3	1	4
629	12/11/2018 9:54	wer456	2	25	2	3	3	7	3	0	1	75	3	1	4
630	12/11/2018 9:54	wer456	1	27	1	3	3	7	3	0	1	89	6	1	4
631	12/11/2018 9:55	wer456	2	20	1	3	3	7	3	0	1	96	8	1	4
632	12/11/2018 9:55	wer456	2	48	2	1	3	7	3	0	1	88	5	1	4
633	12/11/2018 9:55	wer456	2	21	1	3	3	7	3	1	1	91	5	1	4
634	12/11/2018 9:55	wer456	2	21	1	3	3	7	3	1	1	91	5	1	4
636	12/11/2018 9:55	wer456	1	20	1	3	3	7	3	0	1	77	5	1	4
637	12/11/2018 9:56	wer456	2	20	1	3	3	7	3	0	1	80	4	1	4
638	12/11/2018 9:56	wer456	2	20	1	3	3	7	3	1	1	79	8	1	4
639	12/11/2018 9:56	wer456	2	19	1	4	3	7	3	0	1	77	7	1	4
640	12/11/2018 9:56	wer456	2	20	1	3	3	7	3	0	1	84	7	1	4
641	12/11/2018 9:57	wer456	2	38	1	3	3	7	3	0	1	88	5	1	4
642	12/11/2018 9:57	wer456	2	20	1	3	3	7	3	0	1	85	4	1	4
643	12/11/2018 9:57	wer456	2	20	1	3	3	7	3	0	1	76	5	1	4
644	12/11/2018 9:58	wer456	1	20	1	3	3	7	3	0	1	83	5	1	4
645	12/11/2018 9:58	wer456	2	20	1	3	3	7	3	0	1	77	8	1	4
646	12/11/2018 9:58	wer456	2	21	2	5	3	7	3	0	1	79	2	1	4
647	12/11/2018 9:58	wer456	1	21	2	3	3	7	3	0	1	78	3	1	4
648	12/11/2018 9:58	wer456	2	20	2	1	3	7	3	0	1	79	4	1	4
649	12/11/2018 9:59	wer456	1	20	1	1	3	7	3	0	1	82	4	1	4
651	12/11/2018 13:41	wer456	2	48	2	1	3	7	4	0	1	88	5	4	4
652	12/18/2018 12:14:35	wer456	1	20	1	1	3	7	4	0	1	91	6	4	4
653	12/18/2018 12:14:44	wer456	1	21	1	1	3	7	4	0	1	79	4	4	4
654	12/18/2018 12:15:40	wer456	2	20	1	1	3	7	4	1	1	84	7	4	4
655	12/18/2018 12:15:56	wer456	1	20	1	1	3	7	4	0	1	96	8	4	4
656	12/18/2018 12:16:00	wer456	2	20	2	1	3	7	4	0	1	94	8	4	4
657	12/18/2018 12:16:20	wer456	2	20	1	3	3	7	4	0	1	76	5	4	4
658	12/18/2018 12:17:48	wer456	2	20	1	1	3	7	4	0	1	91	9	4	4
659	12/18/2018 12:17:53	wer456	1	20	1	1	3	7	4	0	1	98	8	4	4
660	12/18/2018 12:17:54	wer456	1	20	1	1	3	7	4	0	1	94	5	4	4
661	12/18/2018 12:17:55	wer456	1	20	1	1	3	7	4	0	1	86	2	4	4
662	12/18/2018 12:18:27	wer456	1	20	1	1	3	7	4	0	1	87	8	4	4
663	12/18/2018 12:18:32	wer456	1	20	1	1	3	7	4	0	1	95	9	4	4
664	12/18/2018 12:18:48	wer456	2	19	1	1	3	7	4	1	1	73	10	4	4
665	12/18/2018 12:18:50	wer456	2	20	1	1	3	7	4	0	1	83	9	4	4
666	12/18/2018 12:18:55	wer456	1	20	1	1	3	7	4	0	1	93	6	4	4
667	12/18/2018 12:19:57	wer456	2	20	1	1	3	7	4	0	1	92	10	4	4
668	12/18/2018 12:20:05	wer456	2	20	1	1	3	7	4	0	1	80	7	4	4
669	12/18/2018 12:20:12	wer456	2	20	1	1	3	7	4	0	1	96	7	4	4
670	12/18/2018 12:20:12	wer456	1	20	1	1	3	7	4	0	1	95	6	4	4
671	12/18/2018 12:20:14	wer456	2	20	1	1	3	7	4	1	1	93	7	4	4
672	12/18/2018 12:20:15	wer456	2	20	1	1	3	7	4	0	1	96	9	4	4
673	12/18/2018 12:20:18	wer456	2	20	1	1	3	7	4	0	1	95	9	4	4
674	12/18/2018 12:20:37	wer456	2	20	1	1	3	7	4	0	1	85	3	4	4
675	12/18/2018 12:20:41	wer456	1	20	1	1	3	7	4	0	1	89	5	4	4
676	12/18/2018 12:20:45	wer456	1	20	1	1	3	7	4	0	1	85	8	4	4
677	12/18/2018 12:20:50	wer456	1	20	1	1	3	7	4	0	1	90	10	4	4
678	12/18/2018 12:21:31	wer456	1	20	1	1	3	7	4	0	1	88	6	4	4
679	12/18/2018 12:22:18	wer456	2	21	1	1	3	7	4	0	1	90	8	4	4
680	12/18/2018 12:22:18	wer456	2	20	1	1	3	7	4	0	1	99	8	4	4
681	12/18/2018 12:26:03	wer456	2	22	2	1	3	7	4	0	1	94	8	4	4
682	12/21/2018 12:31:37	wer456	1	20	1	2	3	7	1	0	1	92	2	2	4
683	12/21/2018 12:33:32	wer456	1	20	1	1	3	7	1	0	1	80	7	2	4
684	12/21/2018 12:35:01	wer456	1	20	1	1	3	7	1	0	1	93	5	2	4
685	12/21/2018 12:35:31	wer456	1	21	1	1	3	7	1	0	1	91	7	2	4
686	12/21/2018 12:36:17	wer456	1	20	1	1	3	7	1	0	1	94	7	2	4
688	12/21/2018 12:53:03	wer456	2	20	1	1	3	7	1	0	1	95	8	2	4
689	12/21/2018 12:55:12	wer456	2	30	1	1	3	7	1	0	1	88	4	2	4
690	12/21/2018 12:57:03	wer456	2	21	1	1	3	7	1	0	1	98	6	2	4
691	12/21/2018 12:57:19	wer456	1	38	1	1	3	7	1	0	1	88	6	2	4
692	12/21/2018 12:59:46	wer456	1	21	1	1	3	7	1	0	1	97	3	2	4
693	12/21/2018 13:04:53	wer456	2	20	1	1	3	7	1	0	1	72	4	2	4
694	12/21/2018 13:05:29	wer456	2	20	1	1	3	7	1	0	1	77	5	2	4
695	12/21/2018 13:06:11	wer456	1	20	1	1	3	7	1	0	1	91	7	2	4
696	12/21/2018 13:09:13	wer456	2	21	1	1	3	7	1	0	1	72	2	2	4
697	12/21/2018 13:09:52	wer456	2	31	1	1	3	7	1	0	1	88	4	2	4
698	12/21/2018 13:09:52	wer456	2	21	1	1	3	7	1	1	1	90	7	2	4
699	12/21/2018 13:15:22	wer456	2	22	1	1	3	7	1	0	1	79	6	2	4
515	10/25/2018 12:38:31	tyu678	2	19	1	3	2	8	3	0	1	87	4	1	2
516	10/25/2018 12:39:34	tyu678	1	19	1	2	2	8	3	0	1	83	4	1	2
517	10/25/2018 12:42:10	tyu678	2	22	2	3	2	8	3	0	1	76	4	1	2
518	10/25/2018 12:42:49	tyu678	1	19	1	3	2	8	3	0	1	100	7	1	2
519	10/25/2018 12:42:54	tyu678	2	19	1	3	2	8	3	1	1	59	2	1	2
520	10/25/2018 12:42:57	tyu678	2	18	1	3	2	8	3	0	1	95	7	1	2
521	10/25/2018 12:43:02	tyu678	2	19	1	3	2	8	3	1	1	59	2	1	2
523	10/25/2018 12:43:43	tyu678	2	21	1	4	2	8	3	0	1	85	3	1	2
525	10/25/2018 12:45:30	tyu678	2	20	1	4	2	8	3	0	1	98	6	1	2
526	10/25/2018 12:45:34	tyu678	3	21	1	2	2	8	3	0	1	90	4	1	2
527	10/25/2018 12:46:24	tyu678	2	21	1	3	2	8	3	0	1	84	5	1	2
528	10/25/2018 12:46:38	tyu678	1	23	2	3	2	8	3	0	1	98	8	1	2
529	10/25/2018 12:47:00	tyu678	1	22	1	3	2	8	3	0	1	86	5	1	2
530	10/25/2018 12:47:14	tyu678	2	20	1	3	2	8	3	0	1	79	6	1	2
531	10/25/2018 12:48:01	tyu678	2	20	1	3	2	8	3	0	1	79	8	1	2
532	10/25/2018 12:48:08	tyu678	2	18	1	3	2	8	3	0	1	79	0	1	2
533	10/25/2018 12:49:26	tyu678	2	20	1	1	2	8	3	1	1	76	6	1	2
534	10/25/2018 12:51:13	tyu678	2	20	1	3	2	8	3	0	1	85	3	1	2
535	10/25/2018 12:52:13	tyu678	2	20	1	3	2	8	3	0	1	86	6	1	2
536	10/25/2018 12:53:22	tyu678	1	22	1	4	2	8	3	0	1	96	7	1	2
537	10/25/2018 13:49:26	tyu678	2	21	1	3	2	8	3	0	1	81	4	1	2
538	11/14/2018 12:42:53	tyu678	2	22	1	1	2	8	1	0	1	72	6	2	2
539	11/14/2018 12:43:05	tyu678	1	23	1	1	2	8	1	0	1	79	7	2	2
540	11/14/2018 12:43:55	tyu678	2	19	2	1	2	8	1	0	1	77	5	2	2
541	11/14/2018 12:44:07	tyu678	2	21	1	1	2	8	1	0	1	91	7	2	2
542	11/14/2018 12:45:23	tyu678	2	21	1	1	2	8	1	0	1	84	5	2	2
543	11/14/2018 12:45:54	tyu678	1	26	1	1	2	8	1	0	1	75	4	2	2
544	11/14/2018 12:46:11	tyu678	2	20	1	1	2	8	1	0	1	91	7	2	2
545	11/14/2018 12:46:41	tyu678	2	19	1	1	2	8	1	0	1	78	8	2	2
546	11/14/2018 12:46:46	tyu678	2	20	1	1	2	8	1	0	1	77	7	2	2
547	11/14/2018 12:46:58	tyu678	2	21	1	1	2	8	1	0	1	95	5	2	2
548	11/14/2018 12:47:05	tyu678	1	21	1	1	2	8	1	0	1	94	5	2	2
549	11/14/2018 12:47:15	tyu678	2	19	1	1	2	8	1	0	1	96	4	2	2
550	11/14/2018 12:47:17	tyu678	2	21	1	2	2	8	1	1	1	93	4	2	2
551	11/14/2018 12:47:20	tyu678	1	20	1	1	2	8	1	1	1	97	6	2	2
552	11/14/2018 12:47:23	tyu678	2	20	1	1	2	8	1	0	1	86	6	2	2
553	11/14/2018 12:47:24	tyu678	1	20	1	1	2	8	1	0	1	91	6	2	2
554	11/14/2018 12:47:26	tyu678	1	22	1	1	2	8	1	0	1	92	6	2	2
555	11/14/2018 12:47:38	tyu678	1	20	1	1	2	8	1	0	1	97	7	2	2
556	11/14/2018 12:47:39	tyu678	1	20	1	1	2	8	1	0	1	71	2	2	2
557	11/14/2018 12:47:55	tyu678	1	20	1	2	2	8	1	0	1	63	3	2	2
558	11/14/2018 12:47:55	tyu678	2	20	1	1	2	8	1	0	1	99	7	2	2
559	11/14/2018 12:48:23	tyu678	1	20	1	1	2	8	1	0	1	95	4	2	2
560	11/14/2018 12:48:41	tyu678	2	22	1	1	2	8	1	0	1	79	7	2	2
561	11/14/2018 12:48:53	tyu678	2	20	1	1	2	8	1	0	1	91	2	2	2
562	11/14/2018 12:48:57	tyu678	2	20	1	2	2	8	1	0	1	85	4	2	2
563	11/14/2018 12:52:57	tyu678	2	21	1	1	2	8	1	0	1	86	9	2	2
564	11/23/2018 11:39:44	tyu678	1	20	2	1	2	8	4	1	1	43	4	4	2
565	11/23/2018 11:44:31	tyu678	2	20	1	1	2	8	4	0	1	87	7	4	2
567	11/23/2018 11:45:04	tyu678	1	20	1	1	2	8	4	0	1	80	5	4	2
568	11/23/2018 11:46:06	tyu678	2	20	1	1	2	8	4	0	1	90	8	4	2
570	11/23/2018 11:46:38	tyu678	1	20	1	1	2	8	4	0	1	98	10	4	2
571	11/23/2018 11:47:03	tyu678	2	20	1	1	2	8	4	0	1	93	8	4	2
572	11/23/2018 11:47:05	tyu678	2	21	1	1	2	8	4	0	1	90	8	4	2
573	11/23/2018 11:47:06	tyu678	2	21	1	1	2	8	4	1	1	84	9	4	2
574	11/23/2018 11:47:15	tyu678	2	20	1	1	2	8	4	1	1	85	9	4	2
575	11/23/2018 11:47:20	tyu678	1	20	1	1	2	8	4	1	1	81	5	4	2
576	11/23/2018 11:47:25	tyu678	2	19	1	1	2	8	4	0	1	95	4	4	2
577	11/23/2018 11:47:47	tyu678	2	20	1	1	2	8	4	0	1	95	10	4	2
578	11/23/2018 11:47:52	tyu678	2	20	1	1	2	8	4	0	1	71	3	4	2
581	11/23/2018 11:48:11	tyu678	2	20	1	1	2	8	4	0	1	73	6	4	2
582	11/23/2018 11:48:18	tyu678	2	20	1	1	2	8	4	0	1	88	9	4	2
583	11/23/2018 11:48:33	tyu678	2	20	1	1	2	8	4	0	1	97	6	4	2
584	11/23/2018 11:48:33	tyu678	2	20	1	1	2	8	4	0	1	98	8	4	2
585	11/23/2018 11:48:36	tyu678	2	20	1	1	2	8	4	0	1	96	8	4	2
586	11/23/2018 11:48:46	tyu678	2	20	1	1	2	8	4	0	1	91	7	4	2
587	11/23/2018 11:48:47	tyu678	2	20	1	1	2	8	4	0	1	84	7	4	2
589	11/23/2018 11:49:27	tyu678	2	20	1	1	2	8	4	0	1	87	8	4	2
590	11/23/2018 11:50:25	tyu678	2	20	1	1	2	8	4	0	1	84	6	4	2
591	11/23/2018 11:51:00	tyu678	2	20	2	1	2	8	4	0	1	82	4	4	2
592	11/23/2018 11:51:19	tyu678	2	20	1	1	2	8	4	1	1	79	7	4	2
594	11/23/2018 11:53:16	tyu678	2	20	1	1	2	8	4	1	1	79	6	4	2
595	12/19/2018 17:25:28	tyu678	1	23	2	3	2	8	2	0	1	91	7	3	2
596	12/19/2018 17:26:20	tyu678	1	22	1	3	2	8	2	1	1	79	6	3	2
597	12/19/2018 17:27:24	tyu678	1	21	2	3	2	8	2	0	1	96	5	3	2
598	12/19/2018 17:30:44	tyu678	1	26	1	1	2	8	2	1	1	96	8	3	2
599	12/19/2018 17:31:35	tyu678	1	54	2	3	2	8	2	0	1	78	4	3	2
600	12/19/2018 17:31:55	tyu678	1	23	1	3	2	8	2	0	1	96	7	3	2
601	12/19/2018 17:32:30	tyu678	1	48	2	3	2	8	2	0	1	78	7	3	2
602	12/19/2018 17:32:46	tyu678	1	21	2	3	2	8	2	0	1	80	3	3	2
603	12/19/2018 17:33:08	tyu678	1	21	1	4	2	8	2	0	1	88	7	3	2
604	12/19/2018 17:34:00	tyu678	2	21	1	4	2	8	2	1	1		7	3	2
334	10/22/2018 10:25:27	uio679	2	20	2	3	4	11	2	0	1	74	6	3	1
335	10/22/2018 10:25:32	uio679	1	23	1	1	4	11	2	0	1	95	6	3	1
339	10/22/2018 10:27:46	uio679	1	24	2	1	4	11	2	0	1	94	9	3	1
340	10/22/2018 11:12:10	uio679	1	21	1	3	4	11	3	0	1	97	3	1	1
341	10/22/2018 11:12:35	uio679	2	20	1	3	4	11	3	0	1	61	3	1	1
342	10/22/2018 11:13:15	uio679	1	19	1	3	4	11	3	1	1	57	6	1	1
343	10/22/2018 11:14:16	uio679	2	19	1	3	4	11	3	0	1	92	3	1	1
345	10/22/2018 11:15:28	uio679	2	20	1	3	4	11	3	0	1	84	6	1	1
346	10/22/2018 11:15:33	uio679	2	20	1	3	4	11	3	0	1	80	5	1	1
347	10/22/2018 11:15:50	uio679	2	22	1	1	4	11	3	0	1	92	6	1	1
348	10/22/2018 11:17:05	uio679	2	20	1	3	4	11	3	0	1	86	4	1	1
349	10/22/2018 11:17:19	uio679	2	20	1	4	4	11	3	0	1	76	2	1	1
350	10/22/2018 11:17:50	uio679	1	20	1	1	4	11	3	0	1	96	4	1	1
351	10/22/2018 11:18:22	uio679	2	19	1	3	4	11	3	0	1	80	2	1	1
352	10/22/2018 11:18:27	uio679	1	20	1	3	4	11	3	1	1	90	5	1	1
353	10/22/2018 11:19:04	uio679	2	20	1	3	4	11	3	1	1	83	4	1	1
354	10/22/2018 11:19:12	uio679	2	20	1	3	4	11	3	1	1	83	4	1	1
355	10/22/2018 11:19:32	uio679	2	20	1	3	4	11	3	1	1	81	3	1	1
356	10/22/2018 11:19:40	uio679	2	19	1	4	4	11	3	1	1	82	3	1	1
357	10/22/2018 11:20:03	uio679	2	21	1	3	4	11	3	0	1	91	5	1	1
358	10/22/2018 11:20:50	uio679	2	21	1	4	4	11	3	1	1	76	4	1	1
359	10/22/2018 11:21:01	uio679	2	20	1	4	4	11	3	0	1	73	2	1	1
360	10/22/2018 11:21:59	uio679	2	19	1	2	4	11	3	0	1	81	5	1	1
361	10/22/2018 11:22:20	uio679	2	19	1	3	4	11	3	0	1	93	5	1	1
362	10/22/2018 11:22:58	uio679	2	21	1	3	4	11	3	1	1	95	6	1	1
363	10/22/2018 11:23:11	uio679	2	20	1	3	4	11	3	0	1	72	3	1	1
364	10/22/2018 11:23:15	uio679	2	21	1	3	4	11	3	0	1	89	7	1	1
365	10/22/2018 11:23:19	uio679	2	21	1	3	4	11	3	0	1	81	2	1	1
366	10/22/2018 11:23:50	uio679	2	20	1	3	4	11	3	0	1	92	5	1	1
367	10/22/2018 11:24:07	uio679	2	21	2	3	4	11	3	0	1	72	6	1	1
368	10/22/2018 11:25:24	uio679	2	20	1	3	4	11	3	0	1	89	1	1	1
369	10/22/2018 11:28:08	uio679	2	21	1	3	4	11	3	0	1	89	3	1	1
371	10/22/2018 11:28:15	uio679	2	22	1	3	4	11	3	0	1	76	3	1	1
372	10/22/2018 12:52:00	uio679	1	20	2	1	4	11	1	0	1	76	3	2	1
373	10/22/2018 12:52:30	uio679	2	21	1	1	4	11	1	0	1	87	3	2	1
374	10/22/2018 12:53:21	uio679	2	21	1	1	4	11	1	0	1	86	4	2	1
375	10/22/2018 12:53:24	uio679	1	23	2	1	4	11	1	0	1	87	6	2	1
376	10/22/2018 12:53:36	uio679	2	21	1	1	4	11	1	0	1	87	7	2	1
377	10/22/2018 12:53:57	uio679	1	20	1	1	4	11	1	0	1	96	5	2	1
378	10/22/2018 12:54:00	uio679	1	20	1	1	4	11	1	0	1	86	7	2	1
379	10/22/2018 12:54:10	uio679	1	20	1	1	4	11	1	1	1	73	2	2	1
380	10/22/2018 12:54:10	uio679	2	23	1	2	4	11	1	0	1	67	4	2	1
381	10/22/2018 12:54:14	uio679	1	20	1	1	4	11	1	0	1	96	5	2	1
382	10/22/2018 12:54:15	uio679	1	19	1	1	4	11	1	1	1	62	4	2	1
383	10/22/2018 12:54:24	uio679	2	20	1	1	4	11	1	0	1	80	5	2	1
384	10/22/2018 12:54:37	uio679	2	58	3	1	4	11	1	0	1	95	6	2	1
385	10/22/2018 12:54:41	uio679	2	20	1	1	4	11	1	0	1	74	5	2	1
386	10/22/2018 12:54:45	uio679	2	23	1	1	4	11	1	0	1	81	3	2	1
387	10/22/2018 12:54:46	uio679	2	24	2	1	4	11	1	0	1	74	3	2	1
388	10/22/2018 12:54:48	uio679	2	22	1	1	4	11	1	0	1	71	6	2	1
389	10/22/2018 12:54:57	uio679	1	20	1	1	4	11	1	1	1	79	5	2	1
390	10/22/2018 12:55:17	uio679	2	24	2	1	4	11	1	1	1	85	5	2	1
391	10/22/2018 12:55:20	uio679	2	21	1	1	4	11	1	1	1	84	5	2	1
392	10/22/2018 12:55:30	uio679	2	21	1	1	4	11	1	1	1	84	5	2	1
393	10/22/2018 12:55:59	uio679	1	19	2	1	4	11	1	0	1	79	6	2	1
394	10/22/2018 12:56:08	uio679	2	23	1	1	4	11	1	0	1	87	4	2	1
395	10/22/2018 12:56:33	uio679	2	20	1	1	4	11	1	0	1	96	6	2	1
396	10/22/2018 12:56:35	uio679	2	19	1	1	4	11	1	0	1	92	4	2	1
397	10/22/2018 12:56:55	uio679	1	20	1	1	4	11	1	1	1	79	7	2	1
398	10/22/2018 12:57:03	uio679	1	24	1	1	4	11	1	1	1	75	2	2	1
399	10/22/2018 12:57:11	uio679	1	21	1	1	4	11	1	0	1	92	4	2	1
400	10/22/2018 12:57:15	uio679	2	20	1	2	4	11	1	0	1	87	3	2	1
401	10/22/2018 12:57:19	uio679	2	21	1	1	4	11	1	0	1	95	6	2	1
402	10/22/2018 12:57:44	uio679	2	22	1	1	4	11	1	0	1	77	4	2	1
403	10/22/2018 12:57:59	uio679	2	21	1	1	4	11	1	0	1	86	1	2	1
404	10/22/2018 12:58:12	uio679	1	23	1	1	4	11	1	0	1	83	4	2	1
405	10/22/2018 12:58:22	uio679	1	23	2	1	4	11	1	0	1	80	5	2	1
406	10/22/2018 12:58:39	uio679	2	23	1	1	4	11	1	0	1	72	5	2	1
407	10/22/2018 12:58:52	uio679	2	23	1	1	4	11	1	0	1	95	6	2	1
408	10/22/2018 12:59:39	uio679	2	20	1	1	4	11	1	1	1	75	6	2	1
409	10/22/2018 12:59:48	uio679	2	21	1	1	4	11	1	1	1	74	4	2	1
410	10/22/2018 13:00:05	uio679	2	19	2	1	4	11	1	1	1	84	2	2	1
411	10/22/2018 13:00:09	uio679	2	28	1	1	4	11	1	1	1	76	3	2	1
412	10/22/2018 13:00:10	uio679	1	21	2	1	4	11	1	0	1	92	8	2	1
413	10/22/2018 13:00:59	uio679	2	22	1	1	4	11	1	1	1	74	5	2	1
415	11/26/2018 13:06:33	uio679	2	20	1	1	4	11	4	0	1	91	6	4	1
416	11/26/2018 13:07:15	uio679	2	20	1	1	4	11	4	0	1	92	6	4	1
417	11/26/2018 13:07:22	uio679	2	20	1	1	4	11	4	0	1	74	2	4	1
418	11/26/2018 13:08:33	uio679	2	20	1	1	4	11	4	0	1	86	5	4	1
419	11/26/2018 13:09:05	uio679	2	25	2	1	4	11	4	0	1	96	8	4	1
420	11/26/2018 13:09:30	uio679	2	20	1	1	4	11	4	1	1	90	7	4	1
421	11/26/2018 13:10:58	uio679	2	20	1	1	4	11	4	0	1	97	7	4	1
422	11/26/2018 13:10:58	uio679	2	19	1	1	4	11	4	0	1	84	5	4	1
423	11/26/2018 13:11:01	uio679	1	20	2	1	4	11	4	0	1	100	8	4	1
424	11/26/2018 13:11:30	uio679	1	20	1	1	4	11	4	0	1	93	6	4	1
425	11/26/2018 13:11:42	uio679	1	20	2	1	4	11	4	0	1	98	10	4	1
426	11/26/2018 13:12:38	uio679	2	20	1	1	4	11	4	0	1	85	7	4	1
427	11/26/2018 13:14:09	uio679	2	20	1	1	4	11	4	0	1	77	5	4	1
429	11/26/2018 13:17:40	uio679	2	20	1	1	4	11	4	0	1	75	4	4	1
841	10/30/2018 13:58:15	sdf567	1	23	2	3	1	13	3	0	1	90	5	1	9
842	10/30/2018 13:58:52	sdf567	2	19	1	3	1	13	3	0	1	81	5	1	9
844	10/30/2018 14:00:18	sdf567	2	20	1	4	1	13	3	1	1	96	5	1	9
845	10/30/2018 14:00:25	sdf567	2	20	1	4	1	13	3	0	1	96	6	1	9
846	10/30/2018 14:00:35	sdf567	2	21	1	3	1	13	3	0	1	83	6	1	9
847	10/30/2018 14:00:36	sdf567	2	21	1	1	1	13	3	0	1	85	3	1	9
848	10/30/2018 14:01:08	sdf567	2	21	1	3	1	13	3	0	1	80	3	1	9
850	10/30/2018 14:01:18	sdf567	2	19	1	3	1	13	3	0	1	93	5	1	9
851	10/30/2018 14:01:18	sdf567	2	20	1	3	1	13	3	0	1	76	3	1	9
852	10/30/2018 14:01:25	sdf567	2	20	1	3	1	13	3	0	1	86	5	1	9
853	10/30/2018 14:01:38	sdf567	2	20	1	3	1	13	3	0	1	81	5	1	9
854	10/30/2018 14:01:42	sdf567	2	22	1	1	1	13	3	0	1	95	7	1	9
855	10/30/2018 14:01:43	sdf567	2	20	1	3	1	13	3	0	1	83	6	1	9
856	10/30/2018 14:01:59	sdf567	2	22	2	4	1	13	3	0	1	80	3	1	9
857	10/30/2018 14:02:05	sdf567	1	23	1	1	1	13	3	0	1	94	5	1	9
858	10/30/2018 14:02:05	sdf567	2	21	1	3	1	13	3	0	1	98	5	1	9
859	10/30/2018 14:02:06	sdf567	2	20	1	3	1	13	3	0	1	93	5	1	9
860	10/30/2018 14:02:10	sdf567	2	23	2	3	1	13	3	0	1	96	6	1	9
861	10/30/2018 14:02:12	sdf567	2	19	1	3	1	13	3	0	1	81	2	1	9
862	10/30/2018 14:02:23	sdf567	2	20	1	3	1	13	3	0	1	79	5	1	9
863	10/30/2018 14:02:24	sdf567	2	20	1	3	1	13	3	0	1	67	4	1	9
864	10/30/2018 14:02:32	sdf567	2	20	2	3	1	13	3	0	1	78	3	1	9
865	10/30/2018 14:02:34	sdf567	1	24	1	2	1	13	3	0	1	100	7	1	9
866	10/30/2018 14:02:40	sdf567	2	20	1	5	1	13	3	0	1	90	5	1	9
867	10/30/2018 14:03:10	sdf567	2	20	1	3	1	13	3	0	1	92	4	1	9
868	10/30/2018 14:03:14	sdf567	1	20	1	3	1	13	3	0	1	100	5	1	9
870	10/30/2018 14:03:22	sdf567	1	21	1	3	1	13	3	1	1	77	4	1	9
871	10/30/2018 14:03:25	sdf567	2	20	1	3	1	13	3	0	1	75	4	1	9
872	10/30/2018 14:03:25	sdf567	2	20	1	3	1	13	3	0	1	100	8	1	9
873	10/30/2018 14:03:46	sdf567	2	21	1	3	1	13	3	0	1	84	6	1	9
874	10/30/2018 14:04:44	sdf567	2	21	1	4	1	13	3	0	1	86	4	1	9
875	10/30/2018 14:04:49	sdf567	2	20	1	4	1	13	3	1	1	79	1	1	9
876	10/30/2018 14:04:49	sdf567	2	20	1	4	1	13	2	0	1	94	6	3	9
877	10/30/2018 14:05:36	sdf567	2	21	2	3	1	13	3	0	1	81	4	1	9
878	10/30/2018 14:06:27	sdf567	2	20	1	3	1	13	3	0	1	79	4	1	9
879	10/30/2018 14:07:39	sdf567	2	21	1	1	1	13	3	0	1	95	4	1	9
880	10/30/2018 14:08:45	sdf567	3	22	1	1	1	13	3	0	1	93	4	1	9
881	10/30/2018 14:08:45	sdf567	2	20	1	3	1	13	3	0	1	94	4	1	9
882	10/30/2018 14:09:56	sdf567	2	20	1	3	1	13	3	0	1	74	3	1	9
883	10/30/2018 14:09:58	sdf567	2	20	1	3	1	13	3	0	1	87	4	1	9
884	10/30/2018 14:10:12	sdf567	2	21	2	3	1	13	3	0	1	85	2	1	9
885	10/30/2018 14:15:18	sdf567	2	20	1	3	1	13	3	0	1	92	6	1	9
886	10/30/2018 14:15:49	sdf567	1	20	1	3	1	13	3	0	1	81	6	1	9
887	11/02/2018 12:16	sdf567	2	20	1	1	1	13	4	0	1	98	8	4	9
888	11/02/2018 12:18	sdf567	1	20	1	1	1	13	4	0	1	95	6	4	9
889	11/02/2018 12:19	sdf567	1	20	1	1	1	13	4	0	1	91	8	4	9
890	11/02/2018 12:19	sdf567	1	20	1	1	1	13	4	0	1	92	9	4	9
891	11/02/2018 12:20	sdf567	1	20	1	1	1	13	4	0	1	76	6	4	9
892	11/02/2018 12:20	sdf567	2	20	1	1	1	13	4	0	1	96	8	4	9
893	11/02/2018 12:20	sdf567	2	20	1	1	1	13	4	0	1	94	8	4	9
894	11/02/2018 12:20	sdf567	1	20	1	1	1	13	4	0	1	96	9	4	9
895	11/02/2018 12:20	sdf567	2	19	1	1	1	13	4	0	1	83	7	4	9
896	11/02/2018 12:21	sdf567	2	20	1	1	1	13	4	0	1	93	9	4	9
897	11/02/2018 12:21	sdf567	2	19	1	1	1	13	4	0	1	91	6	4	9
898	11/02/2018 12:21	sdf567	2	20	1	1	1	13	4	0	1	85	6	4	9
899	11/02/2018 12:21	sdf567	2	20	1	1	1	13	4	0	1	91	8	4	9
900	11/02/2018 12:22	sdf567	2	20	1	1	1	13	4	0	1	92	8	4	9
901	11/02/2018 12:22	sdf567	1	20	1	1	1	13	4	0	1	88	8	4	9
902	11/02/2018 12:22	sdf567	1	20	1	1	1	13	4	0	1	100	8	4	9
903	11/02/2018 12:22	sdf567	2	20	1	1	1	13	4	0	1	93	8	4	9
904	11/02/2018 12:22	sdf567	1	20	1	1	1	13	4	0	1	88	8	4	9
905	11/02/2018 12:22	sdf567	2	20	1	1	1	13	4	0	1	90	6	4	9
906	11/02/2018 12:22	sdf567	2	20	1	1	1	13	4	0	1	92	6	4	9
907	11/02/2018 12:22	sdf567	1	22	2	1	1	13	4	0	1	90	5	4	9
908	11/02/2018 12:22	sdf567	2	20	1	1	1	13	4	0	1	93	5	4	9
909	11/02/2018 12:23	sdf567	2	20	1	1	1	13	4	0	1	100	7	4	9
910	11/02/2018 12:23	sdf567	1	21	1	1	1	13	4	0	1	87	9	4	9
911	11/02/2018 12:23	sdf567	2	20	1	1	1	13	4	0	1	89	8	4	9
912	11/02/2018 12:23	sdf567	2	20	1	1	1	13	4	0	1	77	5	4	9
913	11/02/2018 12:23	sdf567	1	23	1	1	1	13	4	0	1	97	9	4	9
914	11/02/2018 12:24	sdf567	1	20	1	1	1	13	4	0	1	95	10	4	9
915	11/02/2018 12:24	sdf567	1	20	2	1	1	13	4	0	1	72	6	4	9
916	11/02/2018 12:24	sdf567	2	20	1	1	1	13	4	1	1	90	7	4	9
917	11/02/2018 12:24	sdf567	1	21	1	1	1	13	4	1	1	78	9	4	9
918	11/02/2018 12:26	sdf567	1	20	1	1	1	13	4	0	1	94	9	4	9
919	11/02/2018 12:26	sdf567	2	20	1	1	1	13	4	0	1	89	7	4	9
920	11/02/2018 12:26	sdf567	2	20	1	1	1	13	4	0	1	89	7	4	9
921	11/06/2018 16:19	sdf567	1	19	1	4	1	13	2	0	1	84	4	3	9
922	11/06/2018 16:21	sdf567	1	20	1	3	1	13	2	0	1	86	5	3	9
923	11/06/2018 16:22	sdf567	1	19	1	3	1	13	2	1	1	81	7	3	9
924	11/06/2018 16:22	sdf567	2	22	1	3	1	13	2	0	1	96	3	3	9
926	11/06/2018 16:23	sdf567	1	19	1	4	1	13	2	0	1	92	6	3	9
927	11/06/2018 16:23	sdf567	1	20	1	3	1	13	2	0	1	95	6	3	9
928	11/06/2018 16:23	sdf567	1	20	1	3	1	13	2	0	1	89	6	3	9
929	11/06/2018 16:23	sdf567	2	20	1	3	1	13	2	0	1	85	4	3	9
930	11/06/2018 16:23	sdf567	2	22	1	3	1	13	2	0	1	81	8	3	9
931	11/06/2018 16:24	sdf567	1	20	1	1	1	13	2	0	1	94	3	3	9
932	11/06/2018 16:24	sdf567	2	20	1	3	1	13	2	0	1	99	6	3	9
934	11/06/2018 16:24	sdf567	1	20	2	3	1	13	2	0	1	85	6	3	9
935	11/06/2018 16:24	sdf567	1	21	1	4	1	13	2	0	1	95	6	3	9
936	11/06/2018 16:24	sdf567	1	20	1	4	1	13	2	0	1	95	4	3	9
937	11/06/2018 16:25	sdf567	1	20	1	3	1	13	2	0	1	96	2	3	9
938	11/06/2018 16:26	sdf567	2	20	1	3	1	13	2	0	1	92	4	3	9
939	11/06/2018 16:26	sdf567	2	20	1	3	1	13	2	0	1	96	6	3	9
940	11/06/2018 16:27	sdf567	1	20	1	3	1	13	2	1	1	97	6	3	9
941	11/06/2018 16:27	sdf567	2	20	1	4	1	13	2	0	1	88	5	3	9
942	1/30/2019 10:50:37	sdf567	1	20	1	1	1	13	1	0	1	91	6	2	9
943	1/30/2019 10:51:00	sdf567	2	20	1	1	1	13	1	0	1	93	2	2	9
944	1/30/2019 10:51:53	sdf567	2	21	2	1	1	13	1	0	1	88	5	2	9
945	1/30/2019 10:52:10	sdf567	1	21	1	1	1	13	1	1	1	98	5	2	9
946	1/30/2019 10:52:24	sdf567	2	20	1	1	1	13	1	1	1	73	8	2	9
947	1/30/2019 10:53:02	sdf567	2	21	1	1	1	13	1	0	1	70	5	2	9
948	1/30/2019 10:53:03	sdf567	2	20	1	2	1	13	1	0	1	83	3	2	9
949	1/30/2019 10:53:29	sdf567	1	21	1	1	1	13	1	0	1	79	6	2	9
950	1/30/2019 10:53:33	sdf567	1	21	1	1	1	13	1	0	1	100	7	2	9
951	1/30/2019 10:54:06	sdf567	2	22	1	1	1	13	1	0	1	100	5	2	9
952	1/30/2019 10:54:12	sdf567	1	20	1	1	1	13	1	0	1	95	6	2	9
953	1/30/2019 10:54:22	sdf567	2	21	2	1	1	13	1	0	1	93	7	2	9
954	1/30/2019 10:54:36	sdf567	2	23	1	1	1	13	1	1	1	70	4	2	9
955	1/30/2019 10:54:47	sdf567	2	21	1	1	1	13	1	0	1	74	4	2	9
956	1/30/2019 10:54:48	sdf567	1	21	1	1	1	13	1		1	79	6	2	9
958	1/30/2019 10:55:43	sdf567	2	22	1	1	1	13	1	0	1	97	5	2	9
959	1/30/2019 10:55:43	sdf567	2	23	1	1	1	13	1	0	1	54	4	2	9
960	1/30/2019 10:55:43	sdf567	2	21	1	1	1	13	1	0	1	82	7	2	9
961	1/30/2019 10:56:20	sdf567	1	21	1	1	1	13	1	0	1	94	8	2	9
962	1/30/2019 10:56:21	sdf567	1	21	1	1	1	13	1	0	1	96	9	2	9
963	1/30/2019 10:56:22	sdf567	1	21	1	1	1	13	1	0	1	99	9	2	9
964	1/30/2019 10:56:32	sdf567	1	27	2	1	1	13	1	0	1	84	1	2	9
965	1/30/2019 10:56:38	sdf567	1	21	2	1	1	13	1	0	1	87	2	2	9
966	1/30/2019 10:56:45	sdf567	1	21	1	1	1	13	1	0	1	100	8	2	9
968	1/30/2019 10:56:47	sdf567	1	20	1	1	1	13	1	0	1	96	4	2	9
969	1/30/2019 10:57:00	sdf567	1	20	1	1	1	13	1	0	1	85	6	2	9
970	1/30/2019 10:57:15	sdf567	1	20	1	1	1	13	1	1	1	69	4	2	9
971	1/30/2019 10:57:30	sdf567	1	21	1	1	1	13	1	0	1	85	5	2	9
972	1/30/2019 10:58:01	sdf567	2	20	1	1	1	13	1	0	1	98	5	2	9
973	1/30/2019 10:58:26	sdf567	2	21	1	1	1	13	1	0	1	96	6	2	9
974	1/30/2019 10:58:29	sdf567	1	21	1	1	1	13	1	0	1	96	6	2	9
975	1/30/2019 10:58:30	sdf567	1	21	1	1	1	13	1	0	1	95	6	2	9
977	10/09/2018 11:20	fgh491	2	20	1	1	6	14	4	0	1	88	5	4	7
978	10/09/2018 11:22	fgh491	2	20	1	1	6	14	4	0	1	96	3	4	7
979	10/09/2018 11:22	fgh491	2	20	1	1	6	14	4	0	1	94	6	4	7
980	10/09/2018 11:22	fgh491	2	20	1	1	6	14	4	0	1	92	9	4	7
981	10/09/2018 11:22	fgh491	1	21	2	1	6	14	4	0	1	93	6	4	7
982	10/09/2018 11:22	fgh491	1	19	1	1	6	14	4	0	1	99	7	4	7
983	10/09/2018 11:23	fgh491	2	20	1	1	6	14	4	0	1	99	5	4	7
984	10/09/2018 11:23	fgh491	1	20	1	1	6	14	4	0	1	100	5	4	7
985	10/09/2018 11:24	fgh491	2	21	1	1	6	14	4	0	1	80	6	4	7
986	10/09/2018 11:24	fgh491	1	19	2	1	6	14	4	0	1	99	7	4	7
987	10/09/2018 11:24	fgh491	2	20	1	1	6	14	4	0	1	99	5	4	7
988	10/09/2018 11:24	fgh491	1	21	2	1	6	14	4	0	1	96	7	4	7
989	10/09/2018 11:24	fgh491	1	20	1	1	6	14	4	0	1	86	6	4	7
990	10/09/2018 11:25	fgh491	2	20	1	1	6	14	4	0	1	91	6	4	7
991	10/09/2018 11:26	fgh491	2	21	1	1	6	14	4	0	1	84	4	4	7
992	10/09/2018 11:26	fgh491	2	20	1	1	6	14	4	0	1	96	8	4	7
993	10/09/2018 11:26	fgh491	2	20	1	1	6	14	4	0	1	93	8	4	7
994	10/09/2018 11:30	fgh491	2	21	1	1	6	14	4	0	1	84	7	4	7
996	10/09/2018 12:07	fgh491	1	20	1	1	6	14	4	0	1	90	7	4	7
997	10/09/2018 12:10	fgh491	1	24	1	1	6	14	4	0	1	80	8	4	7
998	10/09/2018 12:26	fgh491	1	19	1	1	6	14	4	0	1	100	7	4	7
999	10/09/2018 12:42	fgh491	1	20	1	1	6	14	4	0	1	100	6	4	7
1000	10/09/2018 13:12	fgh491	2	19	1	1	6	14	4	0	1	77	3	4	7
1001	10/09/2018 13:57	fgh491	2	23	1	1	6	14	4	0	1	87	6	4	7
1002	10/09/2018 14:23	fgh491	1	20	1	1	6	14	4	0	1	96	7	4	7
1005	10/09/2018 18:39	fgh491	1	20	1	1	6	14	1	0	1	92	7	2	7
1006	10/09/2018 19:23	fgh491	2	20	2	1	6	14	4	0	1	87	8	4	7
1007	10/09/2018 21:39	fgh491	2	21	1	1	6	14	4	0	1	90	5	4	7
1008	10/10/2018 0:16	fgh491	2	19	1	1	6	14	4	0	1	77	3	4	7
1009	12/04/2018 15:19	fgh491	2	20	1	4	6	14	2	0	1	100	4	3	7
1010	12/04/2018 15:19	fgh491	2	20	1	3	6	14	2	0	1	96	6	3	7
1011	12/04/2018 15:20	fgh491	1	20	1	4	6	14	2	0	1	82	2	3	7
1012	12/04/2018 15:20	fgh491	1	25	1	3	6	14	2	0	1	77	4	3	7
1013	12/04/2018 15:20	fgh491	2	23	1	3	6	14	2	0	1	87	6	3	7
1014	12/04/2018 15:21	fgh491	2	49	2	4	6	14	2	0	1	85	4	3	7
1015	12/04/2018 15:21	fgh491	1	20	1	3	6	14	2	0	1	78	3	3	7
1016	12/04/2018 15:22	fgh491	2	20	1	3	6	14	2	0	1	85	2	3	7
1017	12/04/2018 15:23	fgh491	1	20	1	3	6	14	2	0	1	98	5	3	7
1018	12/04/2018 15:23	fgh491	2	24	1	4	6	14	2	0	1	76	5	3	7
1019	12/04/2018 15:25	fgh491	1	25	1	3	6	14	2	0	1	90	5	3	7
1020	12/05/2018 11:08	fgh491	1	26	1	3	6	14	3	0	1	80	0	1	7
1021	12/05/2018 11:08	fgh491	2	20	1	3	6	14	3	0	1	81	5	1	7
1022	12/05/2018 11:09	fgh491	2	22	1	1	6	14	3	0	1	84	6	1	7
1023	12/05/2018 11:09	fgh491	2	20	1	3	6	14	3	0	1	91	5	1	7
1024	12/05/2018 11:10	fgh491	2	20	1	3	6	14	3	0	1	73	3	1	7
1025	12/05/2018 11:10	fgh491	2	22	1	3	6	14	3	0	1	65	2	1	7
1026	12/05/2018 11:10	fgh491	2	22	1	3	6	14	3	0	1	97	4	1	7
1027	12/05/2018 11:10	fgh491	2	20	1	3	6	14	3	0	1	94	4	1	7
1028	12/05/2018 11:11	fgh491	2	20	1	3	6	14	3	0	1	79	5	1	7
1029	12/05/2018 11:11	fgh491	2	20	1	3	6	14	3	0	1	90	4	1	7
1030	12/05/2018 11:12	fgh491	2	24	1	2	6	14	3	0	1	77	4	1	7
1031	12/05/2018 11:12	fgh491	2	23	1	3	6	14	3	0	1	71	6	1	7
1032	12/05/2018 11:13	fgh491	2	27	2	4	6	14	3	0	1	79	2	1	7
1033	12/05/2018 11:15	fgh491	2	28	2	3	6	14	3	0	1	83	6	1	7
1035	12/05/2018 11:25	fgh491	2	20	1	4	6	14	3	0	1	78	7	1	7
1036	12/06/2018 13:14	fgh491	2	63	1	3	6	14	3	0	1	96	4	1	7
1038	5/27/2019 10:12:24	fgh491	2	21	1	1	6	14	1	0	1	95	5	2	7
1039	5/27/2019 10:12:29	fgh491	2	21	1	1	6	14	1	0	1	95	5	2	7
1040	5/27/2019 10:13:02	fgh491	1	21	1	1	6	14	1	0	1	86	7	2	7
1041	5/27/2019 10:13:10	fgh491	2	24	1	1	6	14	1	0	1	87	7	2	7
1042	5/27/2019 10:13:17	fgh491	1	20	1	1	6	14	1	0	1	96	3	2	7
1043	5/27/2019 10:14:02	fgh491	2	19	1	1	6	14	1	0	1	98	5	2	7
1044	5/27/2019 10:14:30	fgh491	2	23	1	1	6	14	1	0	1	96	6	2	7
1045	5/27/2019 10:14:46	fgh491	1	21	1	1	6	14	1	0	1	88	6	2	7
1046	5/27/2019 10:16:27	fgh491	2	21	1	1	6	14	1	0	1	82	4	2	7
1047	5/27/2019 10:16:46	fgh491	1	21	1	1	6	14	1	0	1	93	7	2	7
1048	5/27/2019 10:27:26	fgh491	2	22	1	1	6	14	1	0	1	82	4	2	7
1049	5/27/2019 10:51:49	fgh491	2	21	1	1	6	14	1	0	1	95	5	2	7
