# Supplementary material for: Acceptance and knowledge of evolutionary theory among third-year university students in Spain
Source: PLoS One. 2020 Sep 3;15(9):e0238345. doi: 10.1371/journal.pone.0238345 (PMC7470367; doi:10.1371/journal.pone.0238345)
Supplement: S2 Data — (XLSX) [file pone.0238345.s002.xlsx]

## Sheet: University Questionaries Teache
Timestamp	Código	Sexo	Edad	Nivel	Itinerario	Universidad	Grado	ReligiosoPracticante	complete	X1	X2	X3	X4	X5	X6	X7	X8	X9	X10	X11	X12	X13	X14	X15	X16	X17	X18	X19	X20	X21	X22	X23	X24	X25	X26	X27	X28	X29	X30	filter_$	C1	C3	C5	C8	C11	C12	C13	C16	C18
43803.558923611112	profes	1	53	3	1	1	4	0	1	5	1	5	1	5	1	1	5	1	1	4	5	4	1	1	5	2	4	1	5	5	2	2	3	3	4	1	5	3	1	1	5	5	5	5	4	5	4	5	4
43803.569224537037	profes	2	59	3	1	1	4	1	0	4	2	4	2	3	3	2	4	2	2	4	4	4	2	2	4	2	4	2	4	4	2	2	2	3	4	#NULL!	#NULL!	#NULL!	#NULL!	0	4	4	3	4	4	4	4	4	4
43803.573958333334	profes	1	59	3	1	1	4	0	0	5	2	4	1	4	1	1	5	2	1	5	5	3	1	1	3	1	5	1	5	5	2	2	3	3	1	#NULL!	2	1	#NULL!	0	5	4	4	5	5	5	3	3	5
43803.600451388891	profes	1	39	3	1	1	1	0	1	5	2	5	1	1	1	1	5	1	1	5	5	5	1	1	4	1	5	1	5	5	2	2	3	1	4	2	2	4	4	1	5	5	1	5	5	5	5	4	5
43803.6562037037	profes	1	51	3	1	1	4	0	1	5	1	5	1	5	1	1	5	1	1	5	5	5	1	1	4	1	5	1	5	5	2	2	3	3	4	2	2	4	1	1	5	5	5	5	5	5	5	4	5
43803.676805555559	profes	1	53	3	1	1	4	0	1	5	1	5	1	5	1	1	5	1	1	5	5	5	1	1	1	1	5	1	5	5	2	3	3	5	4	2	2	5	4	1	5	5	5	5	5	5	5	1	5
43803.695335648146	profes	1	55	3	1	1	4	0	1	5	1	5	1	4	1	1	5	1	1	4	5	4	1	1	2	1	5	1	5	2	3	2	3	5	3	2	5	1	1	1	5	5	4	5	4	5	4	2	5
43803.754872685182	profes	1	52	3	1	1	4	0	1	5	1	5	1	5	2	1	5	1	1	5	5	4	1	1	5	1	5	1	5	5	2	2	3	3	4	4	5	4	5	1	5	5	5	5	5	5	4	5	5
43803.786747685182	profes	1	48	3	1	1	4	0	1	5	1	5	1	5	1	1	5	2	1	5	5	5	1	2	5	1	5	1	5	5	2	2	3	3	4	2	2	4	1	1	5	5	5	5	5	5	5	5	5
4/13/2019 11:17:59	profes	1	54	3	1	1	4	0	1	5	1	5	1	5	1	1	5	1	1	5	5	5	1	1	5	1	5	1	5	5	2	2	3	3	4	2	2	4	1	1	5	5	5	5	5	5	5	5	5
4/14/2019 0:07:57	profes	1	45	3	1	1	1	0	1	5	1	5	1	5	1	2	5	1	1	3	1	4	1	1	4	1	4	1	5	5	2	3	2	5	5	2	2	4	4	1	5	5	5	5	3	1	4	4	4
4/15/2019 12:40:09	profes	1	54	3	1	1	4	0	1	5	1	5	1	3	1	1	5	1	1	5	5	5	1	1	#NULL!	2	5	1	5	5	2	2	3	3	4	2	2	4	1	1	5	5	3	5	5	5	5	#NULL!	5
4/23/2019 10:15:25	profes	1	43	3	1	1	4	0	1	5	5	5	1	4	4	1	4	1	1	4	4	4	1	2	5	2	4	1	5	5	2	2	3	3	4	2	4	4	1	1	5	5	4	4	4	4	4	5	4
4/23/2019 13:17:32	profes	1	52	3	1	1	4	0	1	5	1	5	1	5	1	1	5	2	1	5	5	5	1	1	5	1	5	1	5	5	2	2	3	3	4	2	2	4	1	1	5	5	5	5	5	5	5	5	5
4/23/2019 15:38:49	profes	1	58	3	1	1	4	0	1	5	1	5	1	5	1	1	5	1	1	5	5	5	1	1	5	1	5	1	5	5	2	2	3	3	4	2	2	4	1	1	5	5	5	5	5	5	5	5	5
4/24/2019 13:09:44	profes	2	53	3	1	1	4	0	0	5	1	5	1	5	1	1	5	1	1	5	5	5	1	2	5	1	5	1	5	5	2	5	3	3	4	2	2	3	#NULL!	0	5	5	5	5	5	5	5	5	5
4/24/2019 16:32:28	profes	2	52	3	1	1	1	0	1	5	4	5	2	4	2	5	5	3	2	5	4	4	1	2	4	2	5	2	4	5	2	4	3	3	3	2	4	4	4	1	5	5	4	5	5	4	4	4	5
4/24/2019 16:45:33	profes	2	58	3	1	1	1	0	1	1	5	5	1	4	2	1	5	1	1	5	5	5	1	2	4	2	5	2	5	5	2	2	2	3	1	2	2	5	4	1	1	5	4	5	5	5	5	4	5
4/24/2019 17:33:19	profes	1	58	3	1	2	4	0	1	5	2	5	1	4	1	1	5	1	1	5	5	4	1	1	4	1	4	1	5	5	3	2	3	3	4	2	2	4	1	1	5	5	4	5	5	5	4	4	4
4/24/2019 18:07:31	profes	1	25	2	1	2	4	0	1	1	1	1	1	5	1	1	5	1	1	5	5	5	1	1	5	1	5	4	5	5	3	2	3	3	4	1	5	4	5	1	1	1	5	5	5	5	5	5	5
4/24/2019 18:10:47	profes	2	34	3	1	2	4	0	1	5	4	5	2	5	1	1	5	2	1	5	5	3	1	2	4	1	5	2	5	5	2	2	3	3	4	2	2	4	4	1	5	5	5	5	5	5	3	4	5
4/24/2019 18:11:31	profes	1	42	3	1	2	4	0	1	5	1	5	1	5	1	1	5	1	1	5	5	5	1	1	5	1	5	1	5	5	2	2	3	3	4	2	2	4	1	1	5	5	5	5	5	5	5	5	5
4/24/2019 18:12:34	profes	2	30	2	1	2	4	0	1	5	1	5	1	4	2	1	5	2	1	5	4	4	1	2	4	1	4	1	4	2	2	5	2	3	2	5	2	4	4	1	5	5	4	5	5	4	4	4	4
4/24/2019 18:13:20	profes	1	26	2	1	2	4	0	1	5	1	5	1	5	1	1	5	1	1	5	5	5	1	1	5	1	5	1	5	5	2	2	3	3	4	2	3	4	1	1	5	5	5	5	5	5	5	5	5
4/24/2019 18:29:22	profes	2	30	2	1	2	4	0	1	5	1	5	1	5	1	1	5	1	1	4	5	5	1	1	4	1	5	1	5	5	2	2	3	3	4	2	1	5	2	1	5	5	5	5	4	5	5	4	5
4/24/2019 18:47:57	profes	1	49	3	1	2	4	1	0	5	1	5	1	5	1	1	5	1	1	5	5	5	1	1	#NULL!	1	5	1	5	5	2	3	3	3	4	5	2	4	#NULL!	0	5	5	5	5	5	5	5	#NULL!	5
4/24/2019 18:50:41	profes	1	47	3	1	2	4	0	1	5	1	5	1	5	1	1	5	1	1	5	5	5	1	1	5	1	5	1	5	5	2	2	3	3	4	2	2	1	4	1	5	5	5	5	5	5	5	5	5
4/24/2019 19:13:02	profes	3	55	3	1	2	4	0	1	5	1	5	1	5	1	1	5	2	1	5	5	5	1	1	4	1	5	1	5	5	2	2	3	3	4	5	5	1	4	1	5	5	5	5	5	5	5	4	5
4/24/2019 19:18:05	profes	2	62	3	1	2	4	0	1	4	2	2	1	4	2	1	5	3	2	4	4	4	2	2	4	2	4	1	4	5	2	2	3	3	4	2	2	4	4	1	4	2	4	5	4	4	4	4	4
4/24/2019 22:17:23	profes	2	63	3	1	2	4	0	1	5	2	5	1	4	2	1	4	3	2	1	4	4	1	2	4	2	4	1	4	5	2	3	3	3	4	2	2	3	4	1	5	5	4	4	1	4	4	4	4
4/24/2019 22:36:48	profes	1	64	3	1	2	4	0	1	5	2	5	1	5	1	1	5	2	1	4	5	4	1	2	5	1	5	1	5	5	2	3	3	3	4	1	2	5	4	1	5	5	5	5	4	5	4	5	5
4/25/2019 8:14:32	profes	1	56	2	1	2	4	0	0	5	5	5	5	5	5	1	5	1	5	5	5	#NULL!	1	2	5	1	5	1	5	5	2	2	3	3	4	2	#NULL!	#NULL!	5	0	5	5	5	5	5	5	#NULL!	5	5
4/25/2019 8:49:51	profes	2	36	3	1	2	4	0	1	5	2	5	2	4	2	1	4	2	2	5	4	4	1	1	4	1	4	1	4	5	1	5	3	3	4	1	4	4	1	1	5	5	4	4	5	4	4	4	4
4/25/2019 9:01:29	profes	1	60	3	1	1	4	0	1	5	1	5	1	5	1	1	5	2	1	5	5	5	1	2	5	1	5	1	5	5	2	2	3	3	4	2	2	4	1	1	5	5	5	5	5	5	5	5	5
4/25/2019 9:11:44	profes	2	42	3	1	2	4	0	0	5	1	5	1	5	1	1	5	1	1	5	5	4	1	1	5	1	4	1	5	5	2	2	3	3	4	3	#NULL!	#NULL!	#NULL!	0	5	5	5	5	5	5	4	5	4
4/25/2019 10:35:22	profes	1	65	3	1	2	4	0	1	5	1	5	1	4	1	1	5	1	1	5	5	1	1	1	5	2	5	1	5	5	2	2	3	3	4	2	2	4	1	1	5	5	4	5	5	5	1	5	5
4/25/2019 10:38:29	profes	3	53	2	1	2	4	0	1	5	1	5	3	4	1	1	5	5	1	5	2	3	1	1	4	1	3	1	4	2	3	2	3	3	4	4	2	2	2	1	5	5	4	5	5	2	3	4	3
4/25/2019 11:06:11	profes	2	54	3	1	2	4	0	1	5	2	5	1	5	1	1	5	2	1	5	5	5	1	2	5	1	5	1	5	5	2	2	3	3	4	1	2	4	2	1	5	5	5	5	5	5	5	5	5
4/25/2019 11:27:39	profes	1	57	3	1	2	4	0	1	5	1	5	1	5	1	1	5	1	1	5	5	5	1	1	5	1	5	1	5	5	2	2	3	3	4	2	2	5	4	1	5	5	5	5	5	5	5	5	5
4/25/2019 11:37:58	profes	2	58	3	1	2	4	0	1	5	1	5	1	5	1	1	5	4	1	5	5	4	1	1	4	1	4	1	5	5	2	2	3	3	4	1	2	4	5	1	5	5	5	5	5	5	4	4	4
4/25/2019 11:48:38	profes	1	59	3	1	2	4	0	1	5	1	5	1	5	1	1	5	1	1	5	5	4	1	1	4	1	5	1	5	5	2	4	3	3	4	2	2	4	1	1	5	5	5	5	5	5	4	4	5
4/25/2019 13:34:43	profes	1	48	3	1	2	4	0	1	5	1	5	1	4	1	1	5	2	1	5	5	5	1	1	4	1	5	1	5	5	2	2	3	3	4	2	2	1	1	1	5	5	4	5	5	5	5	4	5
4/25/2019 15:26:34	profes	2	41	3	1	2	4	0	1	5	2	5	1	4	1	1	5	2	1	5	5	4	1	1	5	2	5	1	5	5	2	3	3	3	4	2	2	4	1	1	5	5	4	5	5	5	4	5	5
4/25/2019 15:38:03	profes	1	36	3	1	2	4	0	1	5	1	5	1	3	1	1	5	3	1	5	5	5	1	1	5	2	5	1	5	5	2	2	3	3	4	1	4	4	5	1	5	5	3	5	5	5	5	5	5
4/25/2019 17:57:57	profes	1	71	3	1	2	4	0	1	5	1	5	1	5	1	1	5	1	1	5	5	5	1	1	5	1	5	1	5	5	1	2	3	3	4	2	5	5	4	1	5	5	5	5	5	5	5	5	5
4/25/2019 19:26:57	profes	2	51	3	1	2	4	1	1	5	2	5	2	5	2	1	5	2	2	5	4	4	1	2	4	1	4	1	4	5	2	2	3	3	4	2	2	4	4	1	5	5	5	5	5	4	4	4	4
4/25/2019 21:38:51	profes	2	54	3	1	1	4	0	1	5	1	5	1	2	1	1	5	1	1	1	2	2	1	1	4	2	1	1	5	5	3	5	4	3	3	5	2	3	1	1	5	5	2	5	1	2	2	4	1
4/29/2019 10:55:36	profes	1	59	3	1	2	4	0	1	5	2	5	5	4	1	1	5	2	2	4	4	4	1	1	5	2	4	1	5	5	2	2	3	3	4	2	2	4	1	1	5	5	4	5	4	4	4	5	4
4/29/2019 11:47:58	profes	2	62	3	1	1	4	0	1	5	1	5	1	5	1	1	5	2	1	5	5	5	1	4	5	1	5	1	5	5	3	3	3	3	4	2	2	1	4	1	5	5	5	5	5	5	5	5	5
4/29/2019 12:49:13	profes	1	60	3	1	1	4	0	1	5	1	5	1	5	1	1	5	1	1	5	5	5	1	1	5	1	5	1	5	5	2	2	3	3	4	4	4	4	4	1	5	5	5	5	5	5	5	5	5
4/29/2019 16:02:58	profes	2	57	2	1	1	4	1	1	5	1	5	1	5	1	5	5	1	1	5	5	4	1	4	4	1	5	1	5	5	2	2	3	3	4	2	2	4	1	1	5	5	5	5	5	5	4	4	5
43590.851423611108	profes	1	55	3	1	2	4	0	1	5	1	5	1	5	1	1	5	1	1	5	4	3	1	1	4	1	5	1	5	5	3	2	3	3	4	1	2	4	1	1	5	5	5	5	5	4	3	4	5
5/17/2019 9:25:02	profes	1	59	3	1	2	4	1	1	5	1	5	1	4	1	1	5	1	1	5	5	5	1	1	5	1	5	1	5	5	2	2	3	3	4	4	2	4	1	1	5	5	4	5	5	5	5	5	5
[truncated: 25 more columns]
